# Supplementary material for: Identification and temporal expression of putative circadian clock transcripts in the amphipod crustacean Talitrus saltator
Source: PeerJ. 2016 Oct 5;4:e2555. doi: 10.7717/peerj.2555 (PMC5068443; doi:10.7717/peerj.2555)
Supplement: Figure S8 — Alignment of Drosophila melanogaster DCO (Drome-DCO; Accession No. AAF57110) with the T. saltator DBT (Tal-DBT) deduced from the Trinity de novo transcriptome assembly, together with the top two tblastn species homologue sequences Eurydice pulchra CKI-ε (Ep-CKI-ε ; Accession No. KC885972) and Ciona intestinalis CKI (Cioin-CKI; Accession No. XM_002125796). 5’ and 3’ sequence removed from all sequences except Tal-DBT. ’*’ indicates identical amino acid residues in the two proteins, ’.’ and ’:’ indicate similar amino acid residues between the two proteins. In this figure a SMART identified serine/threonine protein kinase catalytic domain is highlighted in yellow. [file peerj-04-2555-s008.pdf]

|           |                                                               |
|-----------|---------------------------------------------------------------|
| Drome-DCO | -MELRVGNKYRLGRKIGSGSFGDIYLGTTINTGEEVAIKLECIRTKHPQLHIESKFYKTM  |
| Tal-DBT   | -MELRVGNKYRLGRKIGSGSFGDIYLGTTNISTAEVAIKLECIRTKHPQLHIESKFYKMM  |
| Ep-CKI-ε  | MMELRVGNKYRLGRKIGSGSFGDIYLGTTNISTGEEVAIKLECIRTKHPQLHIESKFYKMM |
| Cioin-CKI | -MELRVGNKYRLGRKIGSGSFGDIYLGTTNISTGEEVAIKLECVKTKHPQLHIESKFYKMM |
|           | *****.*.*.*****:***** *                                       |
| Drome-DCO | QGGIGIPRIIWCGSEGDNVMVMELLGPSLEDLNFNCSRRFSLKTVLLADQMISRIDYI    |
| Tal-DBT   | AGGVGIPAIKWCGSEGDNVMVMELLGPSLEDLNFNCTRKFSLKTVLLADQLITRIEYI    |
| Ep-CKI-ε  | AGGVGIPSIKWCGSEGDNVMVMELLGPSLEDLNFNCSRKFFLKTVLLADQLITRIEYI    |
| Cioin-CKI | QGGVGIPTVKWCGAEGDYNVLMELLGPSLEDLNFNCSRKFSKTVLLADQLISRIEFI     |
|           | **.*.* : *.*.*****:*****.*:* *****:*.**:*                     |
| Drome-DCO | HSRDFIHRDIKPDNFMGLGKKGNLVYIIDFGLAKKFRDARSLKHIPYRENKNLTGTARY   |
| Tal-DBT   | HSKNFIHRDIKPDNFMGLGKKGNLVYIIDFGLAKKYRDPRTQHPIPYRENKNLTGTARY   |
| Ep-CKI-ε  | HSKNFIHRDIKPDNFMGLGKKGNLVYIIDFGLAKKYRDSRTHLHPIPYRENKNLTGTARY  |
| Cioin-CKI | HSKNFIHRDIKPDNFMGLGKKGNLVYIIDFGLAKKYRDGRTHQHPIPYRENKNLTGTARY  |
|           | **.:*****:*****.*:* *****                                     |
| Drome-DCO | ASINTHLGIEQSRDDLESGLGYVLMYFNLGALPWQGLKAANKRQKYERISEKKLSTSIIV  |
| Tal-DBT   | ASVNTHLGIEQSRDDLESGLGYILMYFNRGSLPWQGLKAATKRQKYERISEKKMQTRIED  |
| Ep-CKI-ε  | ASVNTHLGIEQSRDDLESGLGYVLMYFNRGSLPWQGLKAATKRQKYERISEKKMQTPIEE  |
| Cioin-CKI | ASINTHLGIEQSRDDLESGLGYILMYFNLGTLPWQGLKAATKRQKYERISEKKMSTPIEL  |
|           | *.*.*****:*****.*:*****.*****:.* *                            |
| Drome-DCO | LCKGFPSEFVNYLNFRCRQMHFQRPDYCHLRKLEFRNLFHRLGFTYDYVFDWNLLKFGGPR |
| Tal-DBT   | LCKGFPAEFATYLNVCRTLRFEEKPDYSHLRQLFRQLFHRQGFTYDYVFDWNLLKFVSEH  |
| Ep-CKI-ε  | LCKSFPNEFATYLNFCRSLRFEEKPDYSYLRQLFRQLFHRQGFTYDYVFDWNMLKFGGPR  |
| Cioin-CKI | LCKGHPSEFATYLNFCRSLRFDDKPDYSYLRQLFRNLFHRLQGFTYDYVFDWNMLKFGNRS |
|           | ***..* **..** ** :*:*:*:*:*:*:*:*:***** *****:*** *           |
| Drome-DCO | NPQAIQQAQDGADG-----                                           |
| Tal-DBT   | PSSKQHQQQQ-----                                               |
| Ep-CKI-ε  | NQEEG-DRDRGSNRPQGT-----                                       |
| Cioin-CKI | STDDGKDHRTSASRGLVGSSATRQASTQKKLVVRQSSTMSKAKSKVSSWLTSSVVLHPKK  |
|           | . : :                                                         |

**Figure S8. Putative *Talitrus saltator* DOUBLTETIME (DBT) protein**

Alignment of *Drosophila melanogaster* DCO (Drome-DCO; Accession No. AAF57110) with the *T. saltator* DBT (Tal-DBT) deduced from the Trinity *de novo* transcriptome assembly, together with the top two tblastn species homologue sequences *Eurydice pulchra* CKI-ε (Ep-CKI-ε; Accession No. KC885972) and *Ciona intestinalis* CKI (Cioin-CKI; Accession No. XM\_002125796). 5' and 3' sequence removed from all sequences except Tal-DBT. '\*' indicates identical amino acid residues in the two proteins, '.' and ':' indicate similar amino acid residues between the two proteins. In this figure a SMART identified serine/threonine protein kinase catalytic domain is highlighted in yellow.
