# Supplementary material for: Identification and temporal expression of putative circadian clock transcripts in the amphipod crustacean Talitrus saltator
Source: PeerJ. 2016 Oct 5;4:e2555. doi: 10.7717/peerj.2555 (PMC5068443; doi:10.7717/peerj.2555)
Supplement: Figure S10 — Alignment of Drosophila melanogaster PP1 (Drome-PP1; Accession No. CAA39820) with the T. saltator PP1 (Tal-PP1) deduced from the Trinity de novo transcriptome assembly, together with the top two tblastn species homologue sequences Acromyrmex echinatior PPα2 (Acrec-PPα2; Accesion No. XM_011065955) and Vollenhovia emeryi PPα2 (Volem-PPα2; Accession No. XM_012019400). ’*’ indicates identical amino acid residues in the two proteins, ’.’ and ’:’ indicate similar amino acid residues between the two proteins. In this figure a SMART identified protein phosphatase 2Ac catalytic domains of the serine/threonine phosphatase family is highlighted in yellow. [file peerj-04-2555-s010.pdf]

```

Drome-PP1      -----MSDIMNIDSIISR-----LLEVRGARPGK-----NVQLSE
Tal-PP1        MSSNANTTTPKLSTKERVVKSVFPFPPSHKLTCAEVFDPKTGKPKFEWLKNHFILEGRIEE
Acres-PPα2     -----MAETDKLNIDNIIAR-----LLEVRGARPGK-----NVQLTE
Volem-PPα2     -----MAETDKLNIDNIIAR-----LLEVRGARPGK-----NVQLTE
                :   . . . :   :               **   . . . **               :   :   *

Drome-PP1      SEIRSLCLKSREIFLSQPILLELEAPLKICGDIHGQYYDLLRLFEYGGFPPESNYLFLGD
Tal-PP1        AAALRIINEGAALLRQEKTMIDIEAPVTVCGDIHGQYYDLLRLFEYGGFPPESNYLFLGD
Acres-PPα2     VEIRGLCLKSREIFLSQPILLELEAPLKICGDIHGQYYDLLRLFEYGGFPPESNYLFLGD
Volem-PPα2     VEIRGLCLKSREIFLSQPILLELEAPLKICGDIHGQYYDLLRLFEYGGFPPESNYLFLGD
                :   . .   : . :   : : : : : : : : : : : : : : : : : : : : : :

Drome-PP1      YVDRGKQSLETICLLLAYKIKYAENFFLLRGNHECASINRIYGFYDECKRRYTIKLWKTF
Tal-PP1        YVDRGKQSLETICLLLAYKIKYPENFFLLRGNHECASINRIYGFYDECKRRYNIKLWKTF
Acres-PPα2     YVDRGKQSLETICLLLAYKIKYPENFFLLRGNHECASINRIYGFYDECKRRYNIKLWKTF
Volem-PPα2     YVDRGKQSLETICLLLAYKIKYPENFFLLRGNHECASINRIYGFYDECKRRYNIKLWKTF
                ***** . ***** . *****

Drome-PP1      TDCFNCLPVAAIVDEKIFCCHGGLSPDLQSMEQIRRIMRPTDVPDQGLLCDLLWSDPDKD
Tal-PP1        TDCFNCLPVAAIVDEKIFCCHGGLSPDLQSMEQIRRIMRPTDVPDQGLLCDLLWSDPDKD
Acres-PPα2     TDCFNCLPVAAIVDEKIFCCHGGLSPDLQSMEQIRRIMRPTDVPDQGLLCDLLWSDPDKD
Volem-PPα2     TDCFNCLPVAAIVDEKIFCCHGGLSPDLQSMEQIRRIMRPTDVPDQGLLCDLLWSDPDKD
                ***** . *****

Drome-PP1      TMGWGENDRGVSTFGAEVVGKFLQKHEFDLICRAHQVVEDGYEFFAKRQLVTLFSAPNY
Tal-PP1        TMGWGENDRGVSTFGAEVVAFLHKHDFDLICRAHQVVEDGYEFFAKRQLVTLFSAPNY
Acres-PPα2     TMGWGENDRGVSTFGAEVVAFLHKHDFDLICRAHQVVEDGYEFFAKRQLVTLFSAPNY
Volem-PPα2     TMGWGENDRGVSTFGAEVVAFLHKHDFDLICRAHQVVEDGYEFFAKRQLVTLFSAPNY
                ***** . *** : * : *****

Drome-PP1      CGEFDNAGAMMSVDDTLMCSFQILKPADKRRFVYPNFGSSGRPLTPPRGANNKNKKK-
Tal-PP1        CGEFDNAGAMMSVDETLCSFQILKPADKKKFSYVSLN-SGRPVTPPRGAANQKPKKK
Acres-PPα2     CGEFDNAGAMMSVDETLCSFQILKPADKRKFTYGGLN-AGRPVTPPRGANNKNKKK-
Volem-PPα2     CGEFDNAGAMMSVDETLCSFQILKPADKRKFTYGGLN-AGRPVTPPRGANNKNKKK-
                ***** : ***** : * *   . .   : *** : ***** * : *

```

**Figure S10. Putative *Talitrus saltator* Protein phosphatase 1 (PP1) protein.**

Alignment of *Drosophila melanogaster* PP1 (Drome-PP1; Accession No. CAA39820) with the *T. saltator* PP1 (Tal-PP1) deduced from the Trinity *de novo* transcriptome assembly, together with the top two tblastn species homologue sequences *Acromyrmex echinator* PPα2 (Acres-PPα2; Accession No. XM\_011065955) and *Vollenhovia emeryi* PPα2 (Volem-PPα2; Accession No. XM\_012019400). '\*' indicates identical amino acid residues in the two proteins, '.' and ':' indicate similar amino acid residues between the two proteins. In this figure a SMART identified protein phosphatase 2Ac catalytic domains of the serine/threonine phosphatase family is highlighted in yellow.
