# Supplementary material for: Identification and temporal expression of putative circadian clock transcripts in the amphipod crustacean Talitrus saltator
Source: PeerJ. 2016 Oct 5;4:e2555. doi: 10.7717/peerj.2555 (PMC5068443; doi:10.7717/peerj.2555)
Supplement: Figure S17 — Alignment of Drosophila melanogaster EBONY (Drome-EBONY; Accession No. AAF55870) with the T. saltator EBONY (Tal-EBONY) deduced from the Trinity de novo transcriptome assembly, together with the top two tblastn species homologue sequences Tribolium castaneum EBONY (Trica-EBONY; Accession No. XM_008199683) and Periplaneta americana EBONY (Peram-EBONY; Accession No. AJ865468). ’*’ indicates identical amino acid residues in the two proteins, ’.’ and ’:’ indicate similar amino acid residues between the two proteins. In this figure SMART identified domains consisting of one AMP binding domain, one AMP binding C domain and one PP binding domain are highlighted in yellow, green and blue respectively. [file peerj-04-2555-s017.pdf]

Drome-EBONY MGSLPQLSIVKGLQQDFVPRALHRI FEEQQLR-HADKVALIYQPSTTGQGMAPSQSSYRQ  
 Tal-EBONY -----MVSTLRGPTQCPPPTAHSVVEGFQWAALAHPhKAALVDP-----QRGTRMTYAQ  
 Trica-EBONY MGSLPQLSILKGPTRPLVVSQLGRI FEKVAAGPAASNIALIFE--ENGQ--SRQLSYSQ  
 Peram-EBONY MGSIPTLSILRGDPRPLDSEASLHRL LERAAGASAQQTALLFH-----NQSTSFGA  
 : \* : : \* : : : : \* : : : :

Drome-EBONY MNERANRAARLLVAETHGRFLQPNSDGDGFIVAVCMQPSEGLVTTLLAIWKAGGAYLPIDP  
 Tal-EBONY LRDEVNAIARVLEAHLR-DAPNHNRDGDVLVALCMSPPRLVATILAVMQVGAAYVALDP  
 Trica-EBONY VDQITNKFARVISETIKTKNLKPNSDGDHIIAVNMHPSDHLILVLLSIWKS GCAYLPLDH  
 Peram-EBONY LDAAASRLARALVRRARNVVGARPNSDGDFLVAVCMPEPSERLVVALLAVWKAGAAYLPLDP  
 : . . \* \* : : . \* \* \* : : : \* \* \* \* : . : : : : \* \* \* : : \*

Drome-EBONY SFPANRIHHILLEAKP-TLVI RDDDDIDAGRFQGTPTLSTTELYAKSLQLAGSNLLSEEML  
 Tal-EBONY NFPPSRVDHILQDCAPQLLVVEDGGIMPOSAPYTTTLTTSTIERQMRSQEGTTNPSVRV  
 Trica-EBONY SFPASRIDHIIQESKP-VIVIYDE--DSKNFP--AKLSYEELLTASDGRSDKRLEDKERV  
 Peram-EBONY AFPQARVAHILGEARE-VLVLAKE-DPELFS--DAALYEDLRREAADLSSEPLPDAETL  
 \* \* \* : \* \* : : . \* : : : . : : : . : :

Drome-EBONY RGGNDHTAIVLYTSGSTGVPKGVRLPHESILNRLQWQWATFPYTANEAVSVFKTALTTFVD  
 Tal-EBONY CG-GEDVAVVLYTSGSTGVPKGVRLPHRALLNRLQWQWHTFPYEENE-VCVFKTALTTFVD  
 Trica-EBONY YQ-KDDLAIIVLYTSGSTGIPKGVRI PHKIIILNRLQWQFKTFPFSETEKVCVFKTALTTFVD  
 Peram-EBONY PGCAPTLALVLYTSGSTGVPKGVRLPHAVVLNRLRWQWRTFPYGPQERVCVFKTALTTFVD  
 \* : \* \* \* \* \* : \* \* \* : \* \* : \* \* : \* \* : \* \* : \* \* : \* \* : \* \* : \* \* : \* \* : \* \* : \*

Drome-EBONY SIAELWGPLMCGLAILVVPKAVTKDPQRLVALLERYKIRRLVLVPTLLRSLLMYLKMEGG  
 Tal-EBONY SLSEVLGPLL TGRTL VVVAKSTVARVESLVEVLTQHRVRRLVLVPTLLRALLLHCSRLEP-  
 Trica-EBONY SVCEIWGPLISGISILIVPKSVTLDPKLIQKLDDYKIERLVLVPSLLRSILMCLELK--  
 Peram-EBONY SVGELWGPLLQERSVLVVPREVTKDPERLLRVLEDHQIERLVLVPSLLRSLLLALGLES-  
 \* : \* : \* \* : : : : \* : . . : \* : \* : : : \* \* \* \* : \* \* : : :

Drome-EBONY GAAQKLLYNLQIWVCSGEPLSVSLASSFFDYFDEGVHRLYNFYGSTEVLGDVTFYFACESK  
 Tal-EBONY --SHARLPHLKLWVCSGEQFPLDLLENFFQVFTQ-EQGICNFYGSTEVMGDVTTFVHFKSV  
 Trica-EBONY -KNRTLKLNKLWVCSGETLTTS LAEEFFRYFPENEYKLCNFYGSTEIMGDVTFYIIISGM  
 Peram-EBONY -RNKGMLSRLKTWVCSGEPLSAQLAREFFTYFESGDHILCNFYGSTEVMGDVTYHVVRSA  
 : \* . \* : \* \* \* \* : . . \* . \* \* \* : \* \* \* \* : \* \* \* : .

Drome-EBONY KQLSL---YDNVPIGIPLSNTVVYLLD--ADYRP-----  
 Tal-EBONY EDVRLKVVS SSVPIGEVVSNNCIVLGS DVEELRQRCAAAGGASAAPHSSAGSANSVTN  
 Trica-EBONY QQLKN---LLTVPIGAPVDNTIVYLLD--PELRP-----  
 Peram-EBONY AELKD---STKVPIGRPLDNTAIYLLD--DNFRP-----  
 : : . \* \* \* : : \* : : \* : \*

Drome-EBONY -----VKNG-----  
 Tal-EBONY GNGVTNGNGVANGNGVANGNGVTNGTIVTHRNGVANGNGVQNGNSVANGNGITNGSSITN  
 Trica-EBONY -----VKTG-----  
 Peram-EBONY -----VVSG-----  
 \* . \*

Drome-EBONY -----EIGEIFASGLNLAAGYVNGRD  
 Tal-EBONY GNGTANGNAVTDSTTSGKDCSSPPGVEGHGAPQGGRGGHQKGEMLVYGANLALGYVGVGG  
 Trica-EBONY -----DIGELFVSGNLASGYVNNRD  
 Peram-EBONY -----EAGELYVSGNLQAQGYVKGRD  
 : \* \* : . \* \* \* \* \*

Drome-EBONY PERFLENPLAVEKKYARLYRTGDYGS LK-NGSIMYEGRTDSQVKIRGHRVDLS EVEKNVA  
 Tal-EBONY ADKFFH--LLIDGKTEL VYRTGDFATLHPSGTLLYDGRTDGQIKIRGHRVDCGEVQRAVQ  
 Trica-EBONY KEKFL ENQLAIDPIFSKLYRTGDFARLQ-NDVLLYEGRTDSQVKIRGHRVDLS EVEKAVS  
 Peram-EBONY PERFLANPLTVDP EHSRLYRTGDFAREFV-KGTLVYEGRTDSQVKIRGHRVDLA EVERAVA  
 : : \* : : \* \* \* : : . . : : \* \* \* : \* \* \* \* : \* \* : \*

Drome-EBONY ELPLVDKAI VLCYHAGQVDQAILAFVKLRDDAPMVTETQMEARLKDKLADYMT PQVVILE  
 Tal-EBONY ATEGVTSCAVLCHAPGTVQQALVAFYCS-ETVEDDY EERLEASLASRLLT YMRPKLVRVE  
 Trica-EBONY GVEGVEKAVVLCYQPGEMNQALLAFVKS--SALMNENQIENILRSKLT SYMVPQVILVE  
 Peram-EBONY GLPGVDKCVVLCYKPGELEQALLAYVTTCCKSSMSSQ-QLEAVLHKNLAAAYMLPQVFFVVD  
 \* . . \* \* \* : . \* : \* \* \* : : : : \* . . \* \* \* : : :

|             |                                                                                                                           |
|-------------|---------------------------------------------------------------------------------------------------------------------------|
| Drome-EBONY | HVPLLLVNGKVDRQALLKTYETANNNEGDSSIVLDFDYSQVPEDLKLTARDLFFETVGGVIG                                                            |
| Tal-EBONY   | HMPLLLVNGKVDROKLLGDYSAALHHN----EGSDVDVSGAPEGLQREAVALLTVVGRVLG                                                             |
| Trica-EBONY | SIPLLVNGKIDRQALLKS YENTNNND-DSSVEIEIDYSGVKPAQMAAAKVLFDTVASVLN                                                             |
| Peram-EBONY | SIPLLVNGKTDRQALLRRYESYSTSRNSESEGPELDYTGPVPANRLDAARVLFFETVAEVLG<br>:***** *** ** *. . . * : . * *: .*. **:.                |
| Drome-EBONY | RSTETTLPPhSNFYELGGNSLNSIFTVTLLREKGYNIGISEFIAAKNLGEIIEKMAANDH                                                              |
| Tal-EBONY   | GGSKKLSLSDNFFPIGGDSLNSLVVVTALGDLGYSLGLTDFLDCCDDLEAVVRKMGGKLG                                                              |
| Trica-EBONY | RSARSAISLDSNFYEIGGNSLNSIYITIRLN EEGYQISIGDFLSAIDLGEVLERMTSSND                                                             |
| Peram-EBONY | GGTRSKVGLQANFYELGGNSLNSVFTVTKLRQLGYTIGITDFISSVN LQQVLERMQSND<br>. . . : **:::*:****: .:* * : ** ::*:*: . :* :.:.* . . .   |
| Drome-EBONY | AVQLEEESLNACPHLKMEAVPLRLEHRQEVIDIIIVASFYNKADLEQWLKPGVLRDTDYSDI                                                            |
| Tal-EBONY   | GSEGTVP---PSCSSNYTFHPLQEEME QEVIELLAVSFSSKSDME--VATGAKKEDFYPL                                                             |
| Trica-EBONY | -----IHCSPTYTSELLKNEHKSAVLDIITTSFYQKADLEQWLPDIFESDYKEL                                                                    |
| Peram-EBONY | TTATVS---EKRESKRYSAEMLQDQH KQSVNHMITESFYEKADLEQWLKPDIHREDYKDL<br>* : : .. * .:. **. *:*: * : .. . *: :                    |
| Drome-EBONY | LNDIWNVLVERDLSFVVYDTNTDRIIGTALNFDARNEPEVDIKSKLLIVFEFLEFCGPI                                                               |
| Tal-EBONY   | LHG IYGDVLLQRLSFVVQDA-GGRIVACSLNFDLQAEPFPD VDYPLTWVFDFLDQCESKV                                                            |
| Trica-EBONY | MDALWEPLVEKALSFAVKAESQGIIVGVLNFDARDEPDVQITSKLTVIFEFLFTEVGPV                                                               |
| Peram-EBONY | TDKLWEPLVQKNLSFTVKDT-SGVIPGVVALNFDAHDEPAVEITSKL LIVDFLEFLEGPI<br>. :: : : ***:. . . . ***** : ** *: : * :*:**: *. :       |
| Drome-EBONY | RDNYLPKGLNQILHSFMMGTAEKLNPRENIACMHFMEHEVLRVAREKQFAGIFTTNTSPL                                                              |
| Tal-EBONY   | R-NKLPQNVGEV VHSFMMSTLV DLSPKQNIELVKLMEEHNIRLARERQYKAVFTTNTSAA                                                            |
| Trica-EBONY | RDKCLPGGKGKILHSFMMGTHSSLSPKENVAVMQFMEDEV LKLATERHFEGIFTTNTSPL                                                             |
| Peram-EBONY | RDNKLPQGKGQVLHSFMMATHPSLNYQQNVEVIQFM AEVLTIAHSRGFAGIFTTNTNPL<br>* : * * . .:::*****. *. :*: : :** . : : * : : : .:*****.. |
| Drome-EBONY | TQQL-ADVYHYKTL LN FQVNEYVHSDGSRPF GDAPDEQR AIVHWKEVGK-----                                                                |
| Tal-EBONY   | TRYVCDDL LGYTVLAETPFCSYTAADGQPFIASIPDHVA ACTVFYV-----                                                                     |
| Trica-EBONY | TQQLGTDVYHYQTLLDYQVNRYVASDNTRPFGMAPDSQRAIVQWKPIKSDI VDV                                                                   |
| Peram-EBONY | TQQLGTDI DYKVFN DYQVNL YEAPDGSKPFSEAPDSQRAVCWSRP I-----<br>*: : * : * : * : * : * : * : * : *                             |

**Figure S17. Putative *Talitrus saltator* EBONY protein**

Alignment of *Drosophila melanogaster* EBONY (Drome-EBONY; Accession No. AAF55870) with the *T. saltator* EBONY (Tal-EBONY) deduced from the Trinity *de novo* transcriptome assembly, together with the top two tblastn species homologue sequences *Tribolium castaneum* EBONY (Trica-EBONY; Accession No. XM\_008199683) and *Periplaneta americana* EBONY (Peram-EBONY; Accession No. AJ865468). '\*' indicates identical amino acid residues in the two proteins, '.' and ':' indicate similar amino acid residues between the two proteins. In this figure SMART identified domains consisting of one AMP binding domain, one AMP binding C domain and one PP binding domain are highlighted in yellow, green and blue respectively.
