# Supplementary material for: Identification and temporal expression of putative circadian clock transcripts in the amphipod crustacean Talitrus saltator
Source: PubMed Central journal article supplement (PMC5068443; doi:10.7717/peerj.2555), 2016-10-05
Supplement: peerj-04-2555-s001.pdf [file peerj-04-2555-s001.pdf]

|            |                                                               |
|------------|---------------------------------------------------------------|
| Danpl-CRY2 | PVKQNNYDFKALTLNLNKFSNEPLTFLNQTTPNKNESFGQDVNNVIDVYSTSKPKFYFTDN |
| Tal-CRY2   | -----                                                         |
| Ep-CRY2    | -----                                                         |
| Bomte-CRY1 | -----                                                         |

|            |                                                    |
|------------|----------------------------------------------------|
| Danpl-CRY2 | GVITHNENAQTFKRDSYSDNYNKESTGSNRVGEVHSNNPQTDKISSEKKN |
| Tal-CRY2   | -----                                              |
| Ep-CRY2    | -----                                              |
| Bomte-CRY1 | -----                                              |

**Figure S1. Putative *Talitrus saltator* CRYPTOCHROME 2 (CRY2) protein**

Alignment of *Danaus plexippus* CRY2 (Danpl-CRY2; Accession No. ABA62409) with the *T. saltator* CRY2 (Tal-CRY2) deduced from homology cloning, together with the top two tblastn species homologue sequences *Eurydice pulchra* CRY2 (Ep-CRY2; Accession No. KC885970) and *Bombus terrestris* cryptochrome-1-like (Bomte-CRY1; Accession No. XM\_012312885). '\*' indicates identical amino acid residues in the two proteins, '.' and ':' indicate similar amino acid residues between the two proteins. In this figure SMART identified domains of one DNA photolyase domain and one FAD binding 7 domain are highlighted in yellow and green respectively.
