# Supplementary material for: Identification and temporal expression of putative circadian clock transcripts in the amphipod crustacean Talitrus saltator
Source: PubMed Central journal article supplement (PMC5068443; doi:10.7717/peerj.2555), 2016-10-05
Supplement: peerj-04-2555-s003.pdf [file peerj-04-2555-s003.pdf]

```

Drome-TIM      ELNARQEGSDLKPYLRRMHLVVTAIREFLQAIDTYNKVTHLNEDDKAHLRQLQLQISEMS
Tal-TIM        TT----EKKKIPLWSRRRHNGLRAYQEIIMMSLSAMDKSP--DQ-----
Lotgi          IT----EKKEAKVWGRRAHLALKAYQELMLTLDSDMRSG--NPQVMESKVIKGNLFYMM
Trica-TIM      QS----DKKNAVLWSRRLHLALLAYRELFLLCAMDKSP--DETVRDSARVIKSNIFYIV
                : ..      : * * *   : *  :*:: :: : :: :

```

**Figure S3. Putative *Talitrus saltator* TIMELESS (TIM) protein**

Alignment of *Drosophila melanogaster* TIM (Drome-TIM; Accession no. AAC46920) with the *T. saltator* TIM (Tal-TIM) deduced from the Trinity *de novo* transcriptome assembly, together with the top two tblastn species homologue sequences *Lottia gigantea* hypothetical protein partial (Lotgi; Accession No. XM\_009048115) and *Tribolium castaneum* TIM (Trica-TIM; Accession No. XM\_008202829). 3' sequence removed from all sequences except Tal-TIM. '\*' indicates identical amino acid residues in the two proteins, '.' and ':' indicate similar amino acid residues between the two proteins. In this figure the SMART identified Timeless domain is highlighted in yellow.
