# Supplementary material for: Identification and temporal expression of putative circadian clock transcripts in the amphipod crustacean Talitrus saltator
Source: PubMed Central journal article supplement (PMC5068443; doi:10.7717/peerj.2555), 2016-10-05
Supplement: peerj-04-2555-s006.pdf [file peerj-04-2555-s006.pdf]

```

Drome-CKII-α      -MTLPSAARVYTDVNAHKPDEYWDYENYVVDWGNQDDYQLVLRKLRGKGYSEVF EAINIT T
Tal-CKII-α       MMPFRSRARVYADVNTLRPQDYWDYESHLEWGGQDDYQLVLRKLRGKGYSEVF EAININN
Harsa-CKII-α     -MALPSRARVYADVNSHKPREYWDYESYVVDWGGQDDYQLVLRKLRGKGYSEVF EAINVTN
Oruab-CKII-α     -MALPSRGRVYADVNSHKPRDYWDYESYVVDWGGQDDYQLVLRKLRGKGYSEVF EAINVTN
                  *.: * .***:***: :* :*****.::::***:*****:*****:*****:..

Drome-CKII-α     TEKCVVKILKPVKKKKIKREIKILENLRGGTNIITLLAVVKDPVSRTPALIFEHVNN TDF
Tal-CKII-α       NEKCVVKILKPVKKKKIKREIKILENLRGGTNIITLQAVVKDPVSRTPALVFEHVNN TDF
Harsa-CKII-α     NEKCVVKILKPVKKKKIKREIKILENLRGGTNIITLQAVVKDPVSRTPALIFEHVNN TDF
Oruab-CKII-α     NEKCVVKILKPVKKKKIKREIKILENLRGGTNIITLQAVVKDPVSRTPALIFEHVNN TDF
                  .*****:*****:*****:*****:*****:*****:*****:*****

Drome-CKII-α     KQLYQTLTDYEIRYYLFELLKALDYCHSMGIMHRDVKPHNV MIDHENRKLRLIDWGLAEF
Tal-CKII-α       KQLYQTLNDYDIRYYLYELLKALDYCHSMGIMHRDVKPHNV MIDHENRKLRLIDWGLAEF
Harsa-CKII-α     KQLYQTLNDYDIRYYLYELLKALDYCHSMGIMHRDVKPHNV MIDHENRKLRLIDWGLAEF
Oruab-CKII-α     KQLYQTLTDYDIRYYLYELLKALDYCHSLGIMHRDVKPHNV MIDHENRKLRLIDWGLAEF
                  *****.:**.:***:***:*****:*****:*****:*****:*****:*****

Drome-CKII-α     YHPGQEYNVRVASRYFKGPELLVDYQMYDYSLDMWSLGCMLASMI FRKEPFFHGH DNYDQ
Tal-CKII-α       YHPGQEYNVRVASRYFKGPELLIDYQMYDYSLDMWSLGCMLASMI FRKEPFFHGH DNYDQ
Harsa-CKII-α     YHPGQEYNVRVASRYFKGPELLVDYQMYDYSLDMWSLGCMLASMI FRKEPFFHGH DNYDQ
Oruab-CKII-α     YHPGQEYNVRVASRYFKGPELLVDYQMYDYSLDMWSLGCMLASMI FRKEPFFHGH DNYDQ
                  *****.:*****:*****:*****:*****:*****:*****

Drome-CKII-α     LVRIAKVLGTEELYAYLDKYNIDLDPFRFDILQRHSRKRWERFVHSDNQHLV SPEALDFL
Tal-CKII-α       LVRIAKVLGTEELFEYVEKYHVELDPRFNDILGRHSRKRWERFVHSDNQHLV SPEALDFL
Harsa-CKII-α     LVRIAKVLGTEELFEYLDKYHIELDPRFNDILGRHSRKRWERFVHSDNQHLV SPEALDFL
Oruab-CKII-α     LVRIAKVLGTEELFEYLEKYHIELDPRFNDILGRHSRKRWERFVHSDNQHLV SPEALDFL
                  *****.:*.:**.:**.:*****:*** *****:*****:*****:*****

Drome-CKII-α     DKLLRYDHVDRLTAREAMAHPYFLPIVN--GQMNPNNQ-----
Tal-CKII-α       DKLLRYDHQERLTAHEAMEHPYFAPIVKDGIMIGSPPFPQPPPAVISGIQDE-----
Harsa-CKII-α     DKLLRYDHYERLTAREAMEHPYFYPIVKEQGRLTMVSSSPTPMTGSVPVGDHYRSSWRNN
Oruab-CKII-α     DKLLRYDHYERLTAREAMEHPYFYPIVKEQGRLTIVSSSPTPMPGSLPLDE-----
                  *****.:***:*** *****:***: * :

Drome-CKII-β     -----MSSSEEVSWVTWFCGLRGNEFFCEVDEDIQDKFNLTGLNEQVPHYRQALDMIL
Tal-CKII-β       -----MSSSEEVSWIAWFCGLRGNEFFCEVDEDIQDKFNLTGLNEQVPHYRQALDMIL
Attce-CKII-β     MTTETKMSSSEEVSWISWFCGLRGNEFFCEVDEDIQDKFNLTGLNEQVPHYRQALDMIL
Oruab-CKII-β     -----MSSSEEVSWISWFCGLRGNEFFCEVDEDIQDKFNLTGLNEQVPHYRQALDMIL
                  *****.:*****:*****:*****:*****:*****:*****

Drome-CKII-β     DLEPEDELEDNPLQSDMTEQAAMLYGLIHARYILTNRGIAQMI EKYQAGDFGH CPRVYC
Tal-CKII-β       DLEF-DEEEDLPHQD LVEQAAMLYGLIHARYILTNRGIAQMI EKYQAGDFGH CPRVYC
Attce-CKII-β     DLEPDDDLDDNPNQSDLIEQAAMLYGLIHARYILTNRGIAQMI EKYQAGDFGH CPRVYC
Oruab-CKII-β     DLEPDDDIEDNPNQSDLIEQAAMLYGLIHARYILTNRGIAQMI EKYQAGDFGH CPRVYC
                  **** *.: :* * *.: *****:*****:*****:*****:*****

Drome-CKII-β     ESQPMLPLGLSDIPGEAMVKTYCPKCIDVYTPKSSRHHHTDGAYFGTGFPHMLFMVHPEY
Tal-CKII-β       ENQPMLPIGLSDVPGEAMVKLYCPNCCDVYTPKSSRYNHIDGSY YGTGFPHMLFMVHPEY
Attce-CKII-β     ESQPMLPLGLSDVPGEAMVKSYPKCMDVYTPKSSRHHHTDGAYFGTGFPHMLFMVHPEY
Oruab-CKII-β     ESQPMLPLGLSDVPGEAMVKSYPKCMDVYTPKSSRHHHTDGAYFGTGFPHMLFMVHPEY
                  *.*****:*****:***** *****:*****:*****:*****:*****

Drome-CKII-β     RPKRPTNQFVPRLYGFIHSLAYQIQQAANFKMPLRAKN-----
Tal-CKII-β       RPKRPGTQFVPRLYGFIHPMAYQIQQAANFNAPMRPVNFNNGKR
Attce-CKII-β     RPKRAANQFVPRLYGFIHPVAYQIQQSASTFKAPLRALN YNNGKR
Oruab-CKII-β     RPKRATNQFVPRLYGFIHPLAYQIQQSASTFKAPLR TVNYNNGKR
                  ****. .*****:*****:***:* *:*:*.: *:*.*

```

**Figure S6. Putative *Talitrus saltator* CASEIN KINASE II  $\alpha$  and  $\beta$  (CKII- $\alpha$  and CKII- $\beta$ ) proteins**

Alignment of *Drosophila melanogaster* CKII- $\alpha$  and CKII- $\beta$  (Drome-CKII- $\alpha$  and Drome-CKII- $\beta$ ; Accession No.s AAN11415 and AAF48093 respectively) with the *T. saltator* CKII- $\alpha$  and CKII- $\beta$  (Tal-CKII- $\alpha$  and Tal-CKII- $\beta$ ) deduced from the Trinity *de novo* transcriptome assembly, together with the top two Tal-

CKII- $\alpha$  tblastn species homologue sequences *Harpegnathos saltator* CKII- $\alpha$  (Harsa-CKII- $\alpha$ ; Accession No. XM\_011140473) and *Orussus abietinus* CKII- $\alpha$  (Oruab-CKII- $\alpha$ ; Accession No. XM\_01242321) and the top two Tal-CKII- $\beta$  tblastn species homologue sequences *Atta cephalotes* CKII- $\beta$  (Attce-CKII- $\beta$ ; Accession No. XM\_012208415) and *Orussus abietinus* CKII- $\beta$  (Oruab-CKII- $\beta$ ; Accession No. XM\_012432316). 3' sequence removed from Harsa-CKII- $\alpha$ . '\*' indicates identical amino acid residues in the two proteins, '.' and ':' indicate similar amino acid residues between the two proteins. In this figure SMART identified domains of serine/threonine protein kinase catalytic domain and casein kinase regulatory subunit domain are highlighted in yellow and green respectively.
