# Supplementary material for: Identification and temporal expression of putative circadian clock transcripts in the amphipod crustacean Talitrus saltator
Source: PubMed Central journal article supplement (PMC5068443; doi:10.7717/peerj.2555), 2016-10-05
Supplement: peerj-04-2555-s007.pdf [file peerj-04-2555-s007.pdf]

```

Drome-CWO      RQDPLSHRIIEKRRRDRMNSCLADLSRLIPPQYQRKGRGRIEKTEIEMAIRHLKHLQSE
Tal-CWO        ---PMSHRIIEKRRRDRMNNCLADLSRLIPAIYLKKGRGRIEKTEIEMAIKHLKHLQAH
Metoc          KRDPMSHRIIEKRRRDRMNNCLADLSRLIPAIYLKKGRGRVEKTEIEMAIKHLKHLQSH
Ixosc          ARDPMSHRIIEKRRRDRMNNCLADLSRLIPAVYLKKGRGRVEKTEIEMAIKHLRHLQAH
                *.*****.*****.* :*****:*****:***:***:.

Drome-CWO      CQQKE SDYRSGYDCMKEAAKFLYDVHMQDFCHRLLGRLQEHIDEMFTDCYKSTRSCHM
Tal-CWO        SCKDPATCEVAHR--IETDHRHQYRLGFHECMS-ECVRFLVEIEGMYAGDDLICIRLMNHL
Metoc          ACNDPATCEVAQR--IDTDHRHQYRLGFQECMS-ECVRFLVDIEGRYANDEFICIRLMTHL
Ixosc          SCKDPTTCEVAQR--VDSDHRLQYRLGFQECLS-ETARFLVDLDGSC TADDTCFRLVAHL
                . . . : . . : * : ::: * : .:: * * :

Drome-CWO      PDNVSASSGSPHQAYHPLCHLRDMLATSASDVEHSQDHDNDVKDLSFRNHLNQLQRSQQA
Tal-CWO        QKHFDKVGHGFCYQIPG--GSGPTQ-----NNSSSPNP-----I
Metoc          KKHLDKIQGHNICYQVPGAVGSGPGQSTRTSPVASSSTASNGNSSSSSSGATTPATQIIQ
Ixosc          QKHFDKVS GAGSCYPAGLVLSDEEAT-----M
                .:.. *

Drome-CWO      AAAAAVAAA VAVANGSSPASNAGVDSKVPLTNGGGTGGAPPAADNVPSNSTGSGSAAAC
Tal-CWO        QVNTQSASISIQIRLPFKGM-----
Metoc          QTPQQVPAIPIQIHPSSGVVNVMGSPAATTRLSSDDVRSLESEPSFAFTRRAGGT FAP
Ixosc          EPPERQPKQEPTAALPDGSCS-----SSSSCS-----

```

**Figure S7. Putative *Talitrus saltator* CLOCKWORK ORANGE (CWO) protein**

Alignment of *Drosophila melanogaster* CWO (Drome-CWO; Accession no. AAF54527) with the *T. saltator* CWO (Tal-CWO) deduced from the Trinity *de novo* transcriptome assembly, together with the top two tblastn species homologue sequences *Metaseiulus occidentalis* uncharacterized (Metoc; Accession No. XM\_003744642) and *Ixodes scapularis* conserved hypothetical protein (Ixosc; Accession No. XM\_002400882). 5' and 3' sequence removed from all sequences except Tal-CWO. '\*' indicates identical amino acid residues in the two proteins, '.' and ':' indicate similar amino acid residues between the two proteins. In this figure SMART identified domains of bHLH domain and Orange of the Hairy/E(SPL) family domain are highlighted in yellow and green respectively.
