# Supplementary material for: Identification and temporal expression of putative circadian clock transcripts in the amphipod crustacean Talitrus saltator
Source: PubMed Central journal article supplement (PMC5068443; doi:10.7717/peerj.2555), 2016-10-05
Supplement: peerj-04-2555-s009.pdf [file peerj-04-2555-s009.pdf]

```

Drome-PDP1-ε -----
Tal-PDP1-ε MDTLYSGKNCASLSQMADSTFPSFDGGTTEGAFRASPSCASKDRDGTYPGAVTLLGSNL
Attce-TEF -----
Brafl -----

Drome-PDP1-ε -----MDPQSNAAAAAQLLXPVAMLPLLQRCSCCKWQPG
Tal-PDP1-ε WNKTIPTYDPLKVALEFMDLEEFNLNENSIPVDDSTRSSNVLPENS DVEASHNCG-RVTTT
Attce-TEF -----MSDKDRSSPTLVENS LKSLLD-----QP-
Brafl -----

Drome-PDP1-ε IEWECQWNGNAVVAATGNGNGGNPGQNNNNNNNGNNSGNSNNNSNNNVSSVQHVANAVAAA
Tal-PDP1-ε VADSCSFASLTITAGASSASSSPLRLNLQTHPGYSPASLHDSNSSTYFPPQSELNFMNSD
Attce-TEF -----SIFPLIGNVNG-----
Brafl -----

Drome-PDP1-ε ----VIANEHHNHLNSLKARFQPASSGKSTSNSKEIIC---PDDKYKE---EGDIW-NVE
Tal-PDP1-ε SKLLLDSDSDEAPDSSHMPGGRRSPSPENLTSLSSSLRSMNADDKTVMRSVNSTISSTSE
Attce-TEF -----KSLSNGKEILCKDGPPEKKDA---DGELWGNVE
Brafl -----

Drome-PDP1-ε AQTAFGLG-----PNLWDKTLPYD---AD-----LKVT-QYADLD-----
Tal-PDP1-ε VSNASSQPFQKASEFPNFDDYSVDFHGV TADQSSGGGENPMSMLKIDQTLRDGNSEPHQK
Attce-TEF AQA AFLG-----PNLWDKTLPYD---AD-----LKVLNHYVDLD-----
Brafl -----

Drome-PDP1-ε -----EFLSENNIP-DGLPGTHLGHSSG--LG--HRSDSLGHAAGLSLGLG
Tal-PDP1-ε IDESCASEITSGSWESLRASSQRCDTTSASTVETTGQERGR-RKNQGRGSAKQSTGVR
Attce-TEF -----EFLSENGIPVDGVAGGGQGTMQGSQLHKINNTAAGHQGPAGLHLE
Brafl -----SPPHISME
:

Drome-PDP1-ε HITTKRERSPSPSD-----CISPDTLNPPSPAESTFSFAS-SGRDFDPRTRAFS
Tal-PDP1-ε HRRRRGITSYAEIDDDMISELCDFTTDKPEQVDDDRITPSQHNPNSKTGEKFNPRTRKFS
Attce-TEF PVT-KRERSPSPSE-----CCSPDTLNPPSPADSTLSMAS-SGRDFDPRTRAFS
Brafl EVI-----PEVEYDVSPTDVALASIP-GKEEFNPRKRAFS
* : : . . : * * * *

Drome-PDP1-ε DEELKPQPMIKKSRKQFVPEDE LKDDKYWARRRKNNI AAKRSRDARRQKENQIAMRARYLE
Tal-PDP1-ε EDELKPQPMVKKSRKQYVPPDLKDDKYWARRQKNNVA AKRSRDARRVKENQIALRASFL E
Attce-TEF DEELKPQPMIKKSRKQFVPPDLKDDKYWARRRKNNMAAKRSRDARRMKENQIALRAGFL E
Brafl EEELRPQPMIKKSRKIFVPED LKDDKYWERRKNNVA AKRSRDARRIKENQVALRASFL E
: * * : * * * * * * * * * * * * * * * * * * * * * * * * * * * * * *

Drome-PDP1-ε KENATLHQEVEQLKQENMDLRARLSK FQDV---
Tal-PDP1-ε EMHSLRKLKQLDEANDTISDLRKRLSK YEAV---
Attce-TEF KENMGLRQELDRLKNENMLLRDKLSK YTDV---
Brafl KENATLKEELLKAKEENVILSKLLK YEQQNRV
: : * * * * : : * * * :

```

**Figure S9. Putative *Talitrus saltator* Par Domain Protein 1ε (PDP1ε) protein**

Alignment of *Drosophila melanogaster* PDP1ε (Drome-PDP1-ε; Accession No. AAF04509) with the *T. saltator* PDP1ε (Tal-PDP1-ε) deduced from the Trinity *de novo* transcriptome assembly, together with the top two tblastn species homologue sequences *Atta cephalotes* TEF (Attce-TEF; Accession No. XM\_012203776) and *Branchiostoma floridae* hypothetical protein (Brafl; Accession No. XM\_002601463). '\*' indicates identical amino acid residues in

the two proteins, '.' and ':' indicate similar amino acid residues between the two proteins. In this figure a SMART identified basic region leucin zipper domain is highlighted in green.
