# Supplementary material for: Identification and temporal expression of putative circadian clock transcripts in the amphipod crustacean Talitrus saltator
Source: PubMed Central journal article supplement (PMC5068443; doi:10.7717/peerj.2555), 2016-10-05
Supplement: peerj-04-2555-s011.pdf [file peerj-04-2555-s011.pdf]

|             |                                                              |
|-------------|--------------------------------------------------------------|
| Drome-MTS   | MEDKATTKDLQWIEQLNECNQLTETQVRTLCDKAKEILSKESNVQEVKCPVTVCGDVHG  |
| Tal-MTS     | MEEKTQIKELDQWIEQLMECKQLGENQVKTLCCKAKEVLAKESNVQEVKSPVTVCGDVHG |
| Pedhu-PP-V  | MEEKTSLKELDQWIEQLNECKQLTESQVKTLCCKAKEILAKESNVQEVKCPVTVCGDVHG |
| Nasvi-PPIIA | MEEKASLKELDQWIEQLNDCKQLTESQVKTLCCKAKEILAKESNVQEVKSPVTVCGDVHG |
|             | **:*: *:*:***** :*:** *:*:***:***:*:*****.*****              |
|             |                                                              |
| Drome-MTS   | QFHDLMELFRIGGKSPDTNYLFMGDYVDRGYYSVETVTLVVALKVRYRERITILRGNHES |
| Tal-MTS     | QFHDLMELFKIGGRSPDTNYLFMGDYVDRGYYSVETVTLVTLKVRFRERITILRGNHES  |
| Pedhu-PP-V  | QFHDLMELFRIGGKSPDTNYLFMGDYVDRGYYSVETVTLVVALKVRYRERITILRGNHES |
| Nasvi-PPIIA | QFHDLMELFRIGGKSPDTNYLFMGDYVDRGYYSVETVTLVVALKVRYRERITILRGNHES |
|             | *****:***:*****.*****.*****                                  |
|             |                                                              |
| Drome-MTS   | RQITQVYGFYDECLRKYGNANVWKYFTDLFDYLPLTALVDGQIFCLHGGLSPSIDSLDHI |
| Tal-MTS     | RQITQVYGFYDECLRKYGNANVWKYFTDLFDYLPLTALVDNQIFCLHGGLSPSIDTLDHI |
| Pedhu-PP-V  | RQITQVYGFYDECLRKYGNANVWKFFTDLFDYLPLTALVDGQIFCLHGGLSPSIDTLDHI |
| Nasvi-PPIIA | RQITQVYGFYDECLRKYGNANVWKFFTDLFDYLPLTALVDGQIFCLHGGLSPSIDTLDHI |
|             | *****:*****.*****.*****.*****                                |
|             |                                                              |
| Drome-MTS   | RALDRLQEVPHGPMCDLLWSDPDDRGGWGISPRGAGYTFGQDISETFNNTNGLTLVSRA  |
| Tal-MTS     | RALDRLQEVPHGPMCDLLWSDPDDRGGWGISPRGAGYTFGQDISETFNHSNGLTLVSRA  |
| Pedhu-PP-V  | RALDRLQEVPHGPMCDLLWSDPDDRGGWGISPRGAGYTFGQDISETFNHSNGLTLVSRA  |
| Nasvi-PPIIA | RALDRLQEVPHGPMCDLLWSDPDDRGGWGISPRGAGYTFGQDISETFNHSNGLTLVSRA  |
|             | *****:*****                                                  |
|             |                                                              |
| Drome-MTS   | HQLVMEGYNWCHDRNVVTIFSAFNKYRCGNQAALMELDDSLKFSFLQFDPAPRRGEPHV  |
| Tal-MTS     | HQLVMEGYNWCHERNVVTIFSAFNKYRCGNQAALMELDDSLKYSFLQFDPAPRRGEPHV  |
| Pedhu-PP-V  | HQLVMEGYNWCHDRNVVTIFSAFNKYRCGNQAALMELDDALKYSFLQFDPAPRRGEPHV  |
| Nasvi-PPIIA | HQLVMEGYNWCHDRNVVTIFSAFNKYRCGNQAALMELDDALKYSFLQFDPAPRRGEPHV  |
|             | *****:*****:*****:***:*****                                  |
|             |                                                              |
| Drome-MTS   | TRRTPDYFL                                                    |
| Tal-MTS     | TRRTPDYFL                                                    |
| Pedhu-PP-V  | TRRTPDYFL                                                    |
| Nasvi-PPIIA | TRRTPDYFL                                                    |
|             | *****                                                        |

### Figure S11. Putative *Talitrus saltator* MICROTUBULE STAR (MTS) protein

Alignment of *Drosophila melanogaster* MTS (Drome-MTS; Accession no. AAF52567) with the *T. saltator* MTS (Tal-MTS) deduced from the Trinity *de novo* transcriptome assembly, together with the top two tblastn species homologue sequences *Pediculus humanus corporis* PP-V (Pedhu-PP-V; Accession No. XM\_002426681) and *Nasonia vitripennis* PPIIA (Nasvi-PPIIA; Accession No. XM\_001602456). '\*' indicates identical amino acid residues in the two proteins, '.' and ':' indicate similar amino acid residues between the two proteins. In this figure SMART identified protein phosphatase 2Ac catalytic domains of the serine/threonine phosphatase family are highlighted in green.
