# Supplementary material for: Identification and temporal expression of putative circadian clock transcripts in the amphipod crustacean Talitrus saltator
Source: PubMed Central journal article supplement (PMC5068443; doi:10.7717/peerj.2555), 2016-10-05
Supplement: peerj-04-2555-s012.pdf [file peerj-04-2555-s012.pdf]

```

Drome-WBT      MSSG--TFVDRIDPFAKRSLLKKKGGKKSQGSSRYRNSQDVELQQLPPLKADCSSELEEELEF
Tal-WBT       MSAGSGNFVDRIDPFAKRSLLKKPKRSQGSSRYRTANDVDLQPLPLLK-DVPGGEQEDLEF
Trica-PPIIA   MSTT--AFVDRIDPFAKRSLLKKTKKSQGSSRYRNSQDVELQPLPLLK-DVPASEQEELEF
Bommo-PPIIA   MSSG--TFVDRIDPFAKRSLLKKTKKSQGSSRYRNTQDVELQALPLLK-DVPSSEQEELEF
**:*          ***** *:* ***** .:.*: ** ** * .. **:* **

Drome-WBT      IRKLRQCCVDFDFMDPVTDLGKGEIKRAALNDLSTYITHGRGVLTEPVYPEIIRMISCNL
Tal-WBT       LRKLRQCCVGFDFLDPVADLKGKETKRSTLNELVDYITAGRGVLTEPVYPEIAMIACNL
Trica-PPIIA   IRKLRQCCVDFDFMDPVADLKGKVKRCTLNELVDYITGGRGVLTEPVYPEIIMKISANL
Bommo-PPIIA   IRKLRQCCVAFDFMDPVADLKGKGIKRATLNELVEYIHGGRGVLTEPVYPEIIMKISANL
:*:***** **:* **:* ***** *:* **:* * ** ***** ***** **:* **

Drome-WBT      FRTLPPSENPDFDPEEDDPTLEASWPHLQLVYEVFLRFLESQDFQATIGKRVIDQKFVQLQ
Tal-WBT       FRTLPPSDNPDFDPEEDDPTLEASWPHLQLVYEFFLRFLESDFQPAIGKKVIDQKFVQLQ
Trica-PPIIA   FRTLPPSENPDFDPEEDDPTLEASWPHLQLVYEFFLRFLESDFQPAIGKRVIDQKFVQLQ
Bommo-PPIIA   FRTLPPSENPDFDPEEDDPTLEASWPHLQLVYEFFLRFLESTDFQPTIGKKVIDQKFVQLQ
*****:* ***** ***** ***** ***** **:* **:* ***** **

Drome-WBT      LLELFDSEDPREDFLKTVLHRIYGKFLGLRAFIRKQINNIFLRFIYETEHEFNGVGELLE
Tal-WBT       LLELFDSEDPREDFLKTVLHRIYGKFLGLRAFIRKQINNIFLRFIYETEHEFNGVGELLE
Trica-PPIIA   LLELFDSEDPREDFLKTVLHRIYGKFLGLRAFIRKQINNIFLRFVYETEHEFNGVGELLE
Bommo-PPIIA   LLDLFDSEDPREDFLKTVLHRIYGKFLGLRAFIRKQINNIFLRFVYETEHEFNGVGELLE
*:* ***** ***** ***** ***** ***** ***** ***** *****

Drome-WBT      ILGSIINGFALPLKAEHKQFLVKVLLPLHKVKCLSLYHAQLAYCIVQFLEKDPFLTEPVV
Tal-WBT       ILGSIINGFALPLKAEHKQFLIKVLIPLHKAKCLSLYHAQLAYCVVQFLEKDPFLTEPVI
Trica-PPIIA   ILGSIINGFALPLKAEHKQFLVKVLIPLHKVKCLSLYHAQLAYCVVQFLEKDPFLTEPVV
Bommo-PPIIA   ILGSIINGFALPLKSEHKQFLVKVLLPLHKVKCLSLYHAQLAYCVVQFLEKDATLTEPVV
*****:* *****:* **:* **:* ***** ***** ***** *****

Drome-WBT      RGLLKFWPKTCSQKEVMFLGEIEEILDVIDPPQFVKIQEPLFRQIAKCVSSPHFQVAERA
Tal-WBT       KGLLKIWPKTCSQKEVMFLSEIEEILDVIEPNQFGKVQEPLFKQISKCVSSPHFQVAERA
Trica-PPIIA   RGLLKYWPKTCSQKEVMFLGEIEEVLVDVIEPSQFTRIQEPLFRQIAKCVSSPHFQVAERA
Bommo-PPIIA   RGLLKFWPKTCSQKEVMFLGEIEEILDVIEPAQFAKIQEPLFRQIAKCVSSPHFQVAERA
:*:*** ***** ***** ***** ***** ***** ***** *****

Drome-WBT      LYLWNNNEYAMSLIEENNAVIMPIMPALYRISKEHWNQTIVALVYNVLKTFMEMNSKLF
Tal-WBT       LYFWNNEYIMSLIEENSNVILPIMPALYRISKEHWNQTIVALVYNVLKTFMEMNSKLF
Trica-PPIIA   LYFWNNEYIMSLMEENNHVIMPIMPALYRISKEHWNQTIVALVYNVLKTFMEMNSKLF
Bommo-PPIIA   LYFWNNEYIMSLMEENNHVIMPIMPALYRISKEHWNQTIVALVYNVLKTFMEMNSKLF
*:* ***** **:* **:* **:* ***** ***** ***** ***** *****

Drome-WBT      ELTSSYKAERQKEKKRERDREELWKKLHELESNRSSGRTAGGSATTSNSAASAASTSIQ
Tal-WBT       ELTASYKSERQREKKRDREEREELWKKLQALELNRTQ-----PKE-----
Trica-PPIIA   ELTVSYKAERQKEKKREKERDELWKKLAELELNHNKNLPAQNNSPPSKK-----
Bommo-PPIIA   ELTASYKAERQKEKKREKERDELWKKLGELEISHKR---QQHAAPLAK-----
*** **:* **:* **:* **:* **:* **:* **:* **:* **:* **:* **:* **:*

Drome-WBT      PSSAGLNSHQQSSNSGSSGSLSSGGAGGDNNPATTNKIKQDKADN
Tal-WBT       -----
Trica-PPIIA   -----
Bommo-PPIIA   -----

```

**Figure S12. Putative *Talitrus saltator* WIDERBORST (WBT) protein**

Alignment of *Drosophila melanogaster* WBT (Drome-WBT; Accession No. AAF56720) with the *T. saltator* WBT (Tal-WBT) deduced from the Trinity *de novo* transcriptome assembly, together with the top two tblastn species homologue sequences *Tribolium castaneum* PPIIA (Trica-PPIIA; Accession No. XM\_008197190) and *Bombyx mori* PPIIA (Bommo-PPIIA; Accession No. XM\_004924466). '\*' indicates identical amino acid residues in the two

proteins, '.' and ':' indicate similar amino acid residues between the two proteins. In this figure a SMART identified B56 domain is highlighted in yellow.
