# Supplementary material for: Identification and temporal expression of putative circadian clock transcripts in the amphipod crustacean Talitrus saltator
Source: PubMed Central journal article supplement (PMC5068443; doi:10.7717/peerj.2555), 2016-10-05
Supplement: peerj-04-2555-s013.pdf [file peerj-04-2555-s013.pdf]

```

Drome-TWS      MGRWGRQSPVLEPPDPQMOTTPPPPTLPRTTFMRQSSITKIGNMLNTAININGAKKPASN
Tal-TWS        -----MAGN
Scypa-PPIIA    -----MAGN
Megro-PPIIA    -----MAGN
                * . *

Drome-TWS      G-EASWCFSQIKGALDDDVTDADIISCVFNFHDGELLATGDKGGRVVFQ RDPASKAANP
Tal-TWS        GSDTQWCFSQVKGTLDDDEITDADVISCVFNFHDGELLATGDKGGRVVFQ RDP LSKGCSF
Scypa-PPIIA    G-DIQWCF SQVKGTLDDDVSEADIISCVFNFHDGELLATGDKGGRVVFQ RDPSSKNCHP
Megro-PPIIA    G-DIQWCF SQVKGTLDDDVTEADIISCVFNFHDGELLATGDKGGRVVFQ RDPISKNSIP
                * : .*****:*.*:*:*:*:*:*:*:*:*:*:*:*:*:*:*:*:*:*:*:*:*. *

Drome-TWS      RRGEYNVYSTFQSHEPEFDYLSLEIEEKINKIRWLQKKNPVHFLLSNDKTKLWKVSE
Tal-TWS        TRGEYNVYSTFQSHEPEFDYLSLEIEEKINKIRWLKRKNPAHFLLSNDKTIKLWKVSE
Scypa-PPIIA    RRGEYNVYSTFQSHEPEFDYLSLEIEEKINKIRWLKRKNPAHFLLSNDKTIKLWKVSE
Megro-PPIIA    RRGEYNVYSTFQSHEPEFDYLSLEIEEKINKIRWLKRKNPAHFLLSNDKTIKLWKVSE
                *****:*.*:*:*:*:*:*:*:*:*:*:*:*:*:*:*:*:*:*:*:*. *

Drome-TWS      RDKSFGGYNTKEENGLIRDPQNVLTALRVPSVKQIPLLV EASPRRTFANAHTYHINSISVN
Tal-TWS        RDKRAEGYNLRDDSGQIRDSSSITSLRVPTLKQEMELMVEASPRRIFANAHTYHINSISIN
Scypa-PPIIA    RDKRAEGYNLRDESGQIRDPTSLTALRVPLKPMELMVEASPRRIFANAHTYHINSISIN
Megro-PPIIA    RDKRVEGYNTKEENTIRDPACITSLRVPTIKPMELMVEASPRRIFANAHTYHINSISVN
                *** ** :*:*. * ** . :*:***** :* : * :***** *****:*. *

Drome-TWS      SDQETFLSADDLRINLWHELVNQSYNIVDIKPTNMEELTEVITAAEFHPTECNVYVYSS
Tal-TWS        SDQETFLSADDLRINLWHELVTDQSFNIVDIKPSNMEELTEVITAAEFHPRDCNAFYVYSS
Scypa-PPIIA    SDQETFLSADDLRINLWHEVTDQSFNIVDIKPTNMEELTEVITAAEFHPDCNVYVYSS
Megro-PPIIA    SDQETFLSADDLRINLWHEITDQSFNIVDIKPTNMEELTEVITAAEFHPAECNVLYVYSS
                *****:*****:*.*:*. * *****:***** :*:*. *

Drome-TWS      SKGTIRLCDMRSAAALCDRHSKQFEEPE NPTNRSFFSEI ISSISDVKLSNSGRYMI SRDYL
Tal-TWS        SKGTIRLCDMRAAALCDSHAKMFEEAE DPSNRSFFSEI ISSISDVKFSNSGSLMISRDYL
Scypa-PPIIA    SKGTIRLCDMRQAALCDSHSKLFEEPE DPTNRSFFSEI ISSISDVKFSNSGRYMI SRDYL
Megro-PPIIA    SKGTIRLCDMRSAAALCDQHSKLFEEPE DPTNRSFFSEI ISSISDVKLSNSGRYMI SRDYL
                ***** ***** *:* * ** . * :*:***** :***** *****

Drome-TWS      SIKVVDLHMETKPIETYPVHEYLRAKLCSLYE NDCIFDKFECCWNGKDSIMTGSYNNFF
Tal-TWS        TIKVVDLRKENQPLETYSVHDYLRSKLCSLYE NDCIFDKFECCWNGNDKHIMTGSYNNFF
Scypa-PPIIA    SVKVVDLHMETKPIETYPVHEYLRPKLCSLYE NDCIFDKFECCWNGNSAIMTGSYNNFF
Megro-PPIIA    SVKVVDLQMETKPIECYPVHEYLRSKLCSLYE NDCIFDKFECCWNGNSAIMTGSYNNFF
                :*:*****: *.:*:* * . * :*:*****:***** :*:* *****

Drome-TWS      RVFD RNSKKDVTLEASRDI IAKPVTLVKPRKVCTGG-KRKK DEISVDCLDFNKKILHTAWH
Tal-TWS        RMFD RENKKDVTLEAAREIAKPTVLKPRKIGSGSKRKK DEINVDCLDFSKKILHTAWH
Scypa-PPIIA    RMFD RRTSKRDVTLEASRETAAPRYLLKPRKVCTAG-KRKK DEISVDCLDFNKKILHTAWH
Megro-PPIIA    RVFD RTTKRDLTLEAARDIAKPKTLLKPRKVCTGG-KRKK DEISVDCLDFNKKILHTAWH
                *:* ** . * :*:*****: * :* :*****: * ***** *****

Drome-TWS      PEENI IAVAATNNLFIQDKF
Tal-TWS        PTENVI IAVAATNNLYIFQDKQ
Scypa-PPIIA    PHENI IAVAATNNLYIFQDKF
Megro-PPIIA    PSENVVAVAATNNLFLFIQDKL
                * ** :*:*****:*. *

```

**Figure S13. Putative *Talitrus saltator* TWINS (TWS) protein**

Alignment of *Drosophila melanogaster* (Drome-TWS; Accession no. AAF54498) with the *T. saltator* TWS (Tal-TWS) deduced from the Trinity *de novo* transcriptome assembly, together with the top two tblastn species homologue sequences *Scylla paramamosain* PPIIA (Scypa-PPIIA; Accession No. JQ867383) and *Megachile rotundata* PPIIA (Megro-PPIIA; Accession No. XM\_012288516). '\*' indicates identical amino acid residues in the two proteins, '.' and ':'

indicate similar amino acid residues between the two proteins. In this figure seven SMART identified WD40 domains are highlighted in green.
