# Supplementary material for: Identification and temporal expression of putative circadian clock transcripts in the amphipod crustacean Talitrus saltator
Source: PubMed Central journal article supplement (PMC5068443; doi:10.7717/peerj.2555), 2016-10-05
Supplement: peerj-04-2555-s014.pdf [file peerj-04-2555-s014.pdf]

```

Drome-SGG      MSGRPRTSSFAEGNK-QSPSLVLGGVKTCSRDSKITTVVATPGQGTDRVQEVSYTDTKV
Tal-SGG        MSGRPRTTSFAEGNKGPLAAVNFPGMKISSKDGKVTVVATAGLGSDRPQEVSYMDTKV
Athro-GSK-III MSGRPRTTSFAEGNK-PPTNPPLGGMKISSKDGSKVTVVASAGAGPDRPQEVGYTDTKV
Linhu-GSK-III MSGRPRTTSFAEGNK-PPANPLGGMKISSKDGSKVTVVATPGAGPDRPQEVAYTDTKV
*****:***** . :*:*.*:*.*:*.*:*.*:*.*:*.*:*.*:*.*:

Drome-SGG      INGSFGVVVFQAKLCDTGEIQAIAIKKVLQDRRFKNRELQIMRKLHHCNIVKLLYFFYSSE
Tal-SGG        INGSFGVVVFQAKLVESEIQAIAIKKVLQDKRFKNRELQIMRRLEHCNIVELKYFFYSSCGD
Athro-GSK-III INGSFGVVVFQAKLCDTGEMVAIAIKKVLQDKRFKNRELQIMRRLEHCNIVKLLYFFYSSGD
Linhu-GSK-III INGSFGVVVFQAKLCDSGEMVAIAIKKVLQDKRFKNRELQIMRRLEHCNIVKLLYFFYSSGD
*****:***** :*:*.*:*.*:*.*:*.*:*.*:*.*:*.*:*.*:

Drome-SGG      KRDEVFLNLVLEYIPETVYKVARQYAKTKQTIPINFIRLYMYQLFRSLAYIHSGLGICHRD
Tal-SGG        KKDEVFLNLVLEYVPEIYKVARHHGKQKQTIPIMSYIKLYMYQLFRSLAYMHALGVCHRD
Athro-GSK-III KKDEVFLNLVLEYIPETVYKVARHYSKSKQTIPIISFIKLYMYQLFRSLAYIHSGLGICHRD
Linhu-GSK-III KKDEVFLNLVLEYIPETVYKVARHYSKSKQTIPIISFIKLYMYQLFRSLAYIHSGLGICHRD
*:*.*:*.*:*.*:*.*:*.*:*.*:*.*:*.*:

Drome-SGG      IKPQNLLLDPEAVLKLKCDFGSAKQLLHGEPNVSYICSRYYRAPELIFGAINYTTKIDVW
Tal-SGG        IKPQNLLVDPEAVLKLKCDFGSAKHLVLRGEPNVSYICSRYYRAPELIFGATDYTTNIDVW
Athro-GSK-III IKPQNLLLDPEAVLKLKCDFGSAKHLVKGEPNVSYICSRYYRAPELIFGAIDYTTKIDVW
Linhu-GSK-III IKPQNLLLDPEAVLKLKCDFGSAKHLVKGEPNVSYICSRYYRAPELIFGAIDYTTKIDVW
*****:*.*:*.*:*.*:*.*:*.*:*.*:*.*:*.*:

Drome-SGG      SAGCVLAELLLGQPIFPDGSVDQLVEIIVKVLGTPTREQIREMNPNYTEFKFPQIKSHPW
Tal-SGG        SAGCVLSELLLAQPIFPDGSVDQLVEIIVKVLGTPTREQIREMNPNYTEFKFPQIKSHPW
Athro-GSK-III SAGCVLAELLLGQPIFPDGSVDQLVEIIVKVLGTPTREQIREMNPNYTEFKFPQIKSHPW
Linhu-GSK-III SAGCVLAELLLGQPIFPDGSVDQLVEIIVKVLGTPTRDQIREMNPNYTEFKFPQIKSHPW
*****:***** .*****:*****:*****:*****:*****

Drome-SGG      QKVFRIRTPTEAINLVSLLLEYTPSARITPLKACAHFFFDELMEGNHTLPNGRDMPPPLF
Tal-SGG        QKVFRQRTPEDAINLVSRLLEYTPSARISPLQACTHRFFDELREPN-TRLPNNRPLPPLF
Athro-GSK-III QKVFRARTPPEAMELVARLLEYTPSLRWTPLQACAHSFFNELREQG-TRLPNGRELPLPLF
Linhu-GSK-III QKVFRARTPPEAMDVARLLEYTPSLRMTPLQACAHSFFNELREQG-TRLPNGRELPLPLF
***** ***:*.*:*.*:*.*:*.*:*.*:*.*:*.*:*.*:

Drome-SGG      NFTEHELSIQPSLVPQLLPKHLQNASGPGGNRPSAGGAASIAASGSTSVSSTGSGASVEG
Tal-SGG        NFTELELKIQPELASKLIPSHYQS-----
Athro-GSK-III NFTEQELQIQPTLNSILIPKYM-----
Linhu-GSK-III NFTEHELRIQPVLNSMLIPKYMSTA-----
**** ** ** * . *:*.*:

Drome-SGG      SAQPQSQGTAAAAGSGSGGATAGTGGASAGGPGSGNNSSSGGASGAPSAVAAGGANAAVA
Tal-SGG        -----ESGSG-----GGAVGSEAPTGAAGGS-----
Athro-GSK-III -----TADNPG-----AQSEASNVTAGASGNSSDNSA
Linhu-GSK-III -----AATTTGTEGNPGSGGGGGQSDTTGATASAGNSNDNSV
...* . . .:*.*:

Drome-SGG      GGAGGGGGAGAATAAATATGAIGATNAGGANVTGSQNSALNSSGGSGNGEAAAGSGSG
Tal-SGG        -----VTSANTATAAGAE-----
Athro-GSK-III N-----ISTPTTQNTDPSQSNMA-----
Linhu-GSK-III TNP-----NTTANTSTNTQNTDPSQSNMA-----
: : . .

Drome-SGG      SSGSGGGGNGGDNDAGDSGAIASGGGAAETEAAASG
Tal-SGG        -----
Athro-GSK-III -----
Linhu-GSK-III -----

```

**Figure S14. Putative *Talitrus saltator* SHAGGY (SGG) protein**

Alignment of *Drosophila melanogaster* SGG (Drome-SGG; Accession no. AAN09084) with the *T. saltator* SGG (Tal-SGG) deduced from the Trinity *de novo* transcriptome assembly, together with the top two tblastn species homologue sequences *Athalia rosae* GSK-III

(Athro-GSK-III; Accession No. XM\_012400594) and *Linepithema humile* GSK-III (Linhu-GSK-III; Accession No. XM\_012372547). '\*' indicates identical amino acid residues in the two proteins, '.' and ':' indicate similar amino acid residues between the two proteins. In this figure a SMART identified serine/threonine protein kinase catalytic domain is highlighted in yellow.
