# Supplementary material for: Identification and temporal expression of putative circadian clock transcripts in the amphipod crustacean Talitrus saltator
Source: PubMed Central journal article supplement (PMC5068443; doi:10.7717/peerj.2555), 2016-10-05
Supplement: peerj-04-2555-s015.pdf [file peerj-04-2555-s015.pdf]

```

Drome-SLIMB      -----MMKMETDKIMDETNSNAQAFTTTMLYDPVR-----KKDS-----SPTYQTEREL
Tal-SLIMB        MDTSSPLLDLDDSHDDSKTNIYSAMVHSTTPTATHNNANNRRKESKSGSEYTSQRES
Athro-βTrCP     -----MTILYDPA-----KKEPPTGASAQYQERET
Linhu-βTrCP     -----MINMETDKIIDDTNA-SLQYPMTILYDPSC-----KKEPSTGVSTQYQEREI
                  *           .           :.           *   *   :.*

Drome-SLIMB      CFQYFTQWSESGQVDFVEHLLSRMCHYQHGHINAYLKPMQLQRFITLLPIKGLDHI AENI
Tal-SLIMB        CLKMFEHWSEQDQLEFMEHLLSRMCHYQHGHINAF LKPMQLQRFISLLPKKGLDHVAEKI
Athro-βTrCP     CMKLFERWSEPEQVQFVEQLLARMCHYQHGHINAYLKPMQLQRFISLLPKKGLDHVAESI
Linhu-βTrCP     CMKFFERWTEPEQVHFVEQLLARMCHYQHGHINAYLKPMQLQRFISLLPKKGLDHVAESI
                  *.: *   :.*.*   *.: *.: *.: *.: *.: *.: *.: *.: *.: *.: *.: *.: *

Drome-SLIMB      LSYLDAESLKSSELVCKEWRVISEGMLWKKLIERKVRTDSLWRGLAERRNWMQYLFKPR
Tal-SLIMB        LSYLDGKSLRDAELVCREWQRVIADGVLWKKLIERKVRTDPLWKGLSERRGWGQFLFKPR
Athro-βTrCP     LSYLDADSLCAAEMVCKGWYRVISEGMLWKKLIERKIRTDSLWRGLAERTGWIQYFFKPR
Linhu-βTrCP     LSYLDAKSLVSAELVCKEWHRVISEGMLWKKLIERKVRTDSVWRGLAERRGWIQYLFKPR
                  *****.:.*   :.*.: *   *.: *.: *.: *.: *.: *.: *.: *   *   :.:*****

Drome-SLIMB      PGQTQRPHSFHRELFPKIMNDIDSIENNWRTGRHMLRRINCRSENSKGVYCLQYDDGKIV
Tal-SLIMB        PGEQPHSHSYRKMYPKIIQNIKTIEANWRMGRHNLQKINCRSETSKGVYCLQYDDNKIV
Athro-βTrCP     PGETHPNHIFYRTLFPKIIITDIDNIENNW RMGRHNLQRINCRSENSKGVYCLQYDDQKIV
Linhu-βTrCP     PGESHPNHNFYRSLYPKIVKDIESIENNW RMGRFNLQRINCRSENSKGVYCLQYDDQKIV
                  **.: *   :.: *   :.: *.: *.: *.: *.: *.: *.: *.: *.: *.: *.: *

Drome-SLIMB      SGLRDNTIKIWRDRTLQCVKTLMGHTGSVLC LQYDDKVIISGSSDSTVRVWDVNTGEMVN
Tal-SLIMB        SGLRDNTIKMWRDRTLQCYKVLGTGHTGSVLC LQYDERVIIISGSSDSTVRVWDANTGEMTN
Athro-βTrCP     SGLRDNTIKIWRDRTLQCIKVLGTGHTGSVLC LQYDDKAIISGSSDSTVRVWDANTGEMLN
Linhu-βTrCP     SGLRDNTIKIWRDRTLQCIKVLGTGHTGSVLC LQYDDKAIISGSSDSTVRVWDANTGEMVN
                  *****.:.*   :.*   *   *   *   *   *   *   *   *   *   *

Drome-SLIMB      TLIHHCEAVLHLRFNNGMMVTC SKDRSIAVWDMTSPSEITLRRVLVGHRAAVNVVDFDEK
Tal-SLIMB        TLIHHCEAVLHLRFNTGLLVTC SKDRSIAVWDMVSASEINLRRVLVGHRAAVNVVDFDEK
Athro-βTrCP     TLIHHCEAVLHLRFNNGMMVTC SKDRSIAVWDMTSQTEITLRRVLVGHRAAVNVVDFDEK
Linhu-βTrCP     TLIHHCEAVLHLRFNNGMMVTC SKDRSIAVWDMTSQTEIALRRVLVGHRAAVNVVDFDEK
                  *****.:.*   :.:*****.: *   :.* *****.:*****

Drome-SLIMB      YIVSASGDRTIKVWTSCEFEVRTLNHGKRG IACLQYRDRLVVS GSSDNSIRLWDIECGA
Tal-SLIMB        YIVSASGDRTIKVGTSCEFEVRTLNHGKRG IACLQYRDRLVVS GSSDNTIRLWDIEYGA
Athro-βTrCP     YIVSASGDRTIKVVNTSCEFEVRTLIGHKRG IACLQYRDRLVVS GSSDNTIRLWDIECGA
Linhu-βTrCP     YIVSASGDRTIKVVNTSNCFEVRTLNHGKRG IACLQYRDRLVVS GSSDNTIRLWDIECGA
                  *****.: *   *   *   *   *   *   *   *   *   *   *

Drome-SLIMB      CLRVLEGHEELVRCIRFDTKRIVSGAYD GKIKVVDLVAALDPRAASNTLCLRTLVEHTGR
Tal-SLIMB        CLRILDGHEELVRCIRFDNKRIVSGAYD GKIKVVDLHAALDPRSPAGTLCRLTLVEHSGR
Athro-βTrCP     CLRVLEGHEELVRCIRFDNKRIVSGAYD GKIKVVDLVSALDPRAPASTLCLRTLVEHTGR
Linhu-βTrCP     CLRVLEGHEELVRCIRFDSKHIVSGAYD GKIKVVDLVAALDPRAVASTLCLRTLVEHTGR
                  **.: *.:*****.: *.:*****.: *.:*****.: *.:*****.: *

Drome-SLIMB      VFRLQDFEFQIVSSSHDDTILIWDFLNFTPNEN--KTGR-----
Tal-SLIMB        VFRLQDFEFQIVSSSHDDTILIWDFLNCSPPDTPPLQG PLASSPASDTGVSAAGGGGGTA
Athro-βTrCP     VFRLQDFEFQIVSSSHDDTILIWDFLNFSPEGT PASGNASINTS-----
Linhu-βTrCP     VFRLQDFEFQIVSSSHDDTILIWDFLNYPSSG SVCSGRLPMDG-----
                  *****.: *   .   *

Drome-SLIMB      -----TPSPALMEH-----
Tal-SLIMB        TAGAAQPVVQPPGPVLF RGAEGPAPLPCTPPLPSNDSMDRSIDEGQD
Athro-βTrCP     ---VANQSSTRSPSFFE-----
Linhu-βTrCP     ---APIQSDTRSPSFFE-----
                  . . *   :.

```

**Figure S15. Putative *Talitrus saltator* SUPERNUMERARY LIMBS (SLIMB) protein**

Alignment of *Drosophila melanogaster* SLIMB (Drome-SLIMB; Accession No. AAF55853) with the *T. saltator* SLIMB (Tal-SLIMB) deduced from the Trinity *de novo* transcriptome assembly, together with the top two tblastn species homologue sequences *Athalia rosae*

$\beta$ TrCP (Athro- $\beta$ TrCP; Accession No. XM\_012405697) and *Linepithema humile*  $\beta$ TrCP (Linhu- $\beta$ TrCP; Accession No. XM\_012367510). '\*' indicates identical amino acid residues in the two proteins, '.' and ':' indicate similar amino acid residues between the two proteins. In this figure SMART identified domains of one D domain of beta-TrCP, one F box domain and seven WD40 domains are highlighted in yellow, green and blue respectively.
