# Supplementary material for: Identification and temporal expression of putative circadian clock transcripts in the amphipod crustacean Talitrus saltator
Source: PubMed Central journal article supplement (PMC5068443; doi:10.7717/peerj.2555), 2016-10-05
Supplement: peerj-04-2555-s016.pdf [file peerj-04-2555-s016.pdf]

Drome-VRI MSIVCTLEQKVNFKAATTKNLLILKNNTDTNYINNYKQDNPSNNKFPRIQAQSNNSHL  
Tal-VRI -----MTAVMQN-----V  
Cluma-VRI -----  
Acypi-VRI -----MVADTANSYHHQQKTQQQP-----

Drome-VRI QHQQQIQKLAQLHHYSQQKLSGSDFPYGPRPPTGGKEEKLLLLLAPPGKLYPEASVSTAM  
Tal-VRI LQREIMVAETVKSYYP-----ALLPLA  
Cluma-VRI -----VMVTELHHQE---SG-----APINGG-----TIQRNI  
Acypi-VRI QQLNQHQHQQQQHHHQ-----QQQKQL  
: :

Drome-VRI PEVLSGTPTNSHNKANIAMNVRLSNISPTLSMNGSSNEASNLHPLSMYGGISIPQSN  
Tal-VRI QQGLNYSCTTSSCGPSLLPQALGQPYPAQASPIEMRNHVGRARNAPSLGANVSSTPSG--  
Cluma-VRI DSGLS-KSCHYSNDSSVLMML---RSDSMSPTMMS----EMGDEH---YSKSSPNS--  
Acypi-VRI HQQQQQQLHQIHLRQQQQQ---QEQNSGGAMPQYCSDMEQSGGPGSMRYDDSVSPGP--  
. . . : : . . . \*

Drome-VRI SGMSDSLGYVPGSGYGDGMMMAQSPSQGGNGPQ---SALTAAQKELFSQRKQREFTPDNK  
Tal-VRI -----LGASGMIGAN-----SALLKDSIFAQRKQREFIPDSK  
Cluma-VRI -----PTPYDG-----SVKRKDIQFSQRKQREFIPDAK  
Acypi-VRI -----ESPGPEPYPPGFDLTAHLQHKEFFAQRKQREFIPDNK  
\* :. . . \* : \* \* \* \* \* \* \* \*

Drome-VRI KDES YWDRRRRNNEAAKRSREKRRYNDMVLEQRVIELTKENHVLKAQLDAIRDKNISGE  
Tal-VRI KDES YWDRRRRNNEAAKRSREKRRFNDMILEQRVIELSKENHILRAQLTALENKFHVKE  
Cluma-VRI KDDS YWDRRRRNNEAAKRSREKRRFNDMVLEQRVIELTKENHVLKAQLDAIKDKYNISGE  
Acypi-VRI KDES YWDRRRRNNEAAKRSREKRRFNDMILEQRVVELSKENHVLKAQLSAIKDKFGISGE  
\* : \* \* \* \* \* \* \* \* \* \* \* \* \* \* \* \* \* \* \* \* \* \* \* \* \* \* \* \* \* \* \* \* \* \* \* \*

Drome-VRI NLVS VEKILASLPTSEQVLSNTKRAKMSGSGSSSSGSSPSGSGSGEGSPQGGHNGYPVGP  
Tal-VRI GLVNEEQVLSSMPQADQILSLTRRSNLSLSMTSP-----TS  
Cluma-VRI NLVSVDQIMATLPTSEQVLSLTKR-----  
Acypi-VRI AVVSVEQVMASLPTNEQVLSITKRPKLSTSSSSSS-----VG-  
: \* . : : : : \* : \* : \* \* \* \*

Drome-VRI PLSPLIYGPNGNARPEATVKS VH IHHAGVAPPPTHLQQLVVPQSQTQHLYQPQPQQHQ  
Tal-VRI LLSPTSMPTSPAP-----P  
Cluma-VRI -----P  
Acypi-VRI -----YSQNGSG-----P

Drome-VRI HQQQQISQPPQQQQQQEFPSPSAGSSSPVISDPHNRPPSTTIANLQVQLQQALNRNVRPE  
Tal-VRI QQSSHSEDDHHFAVPQYSQHQMESLPSPPQSNARSQSPDYQRDVP LQAQSSQ-----  
Cluma-VRI -----  
Acypi-VRI IPTSVIHQPVQSTTPKMNGSRTMAVHSPTAT-----

Drome-VRI DLDSLKRKVAAGALYNAAAVVGAPPPPSAGLYVPAPSAYKDHLEAAAASHNVEAAVSS  
Tal-VRI -----AHSTYSSSESHLYES  
Cluma-VRI -----  
Acypi-VRI -----

Drome-VRI SAVDAVSSSSVSGSAASVLNLSRRACSPSYEHMLSSTTSSTLSSASSSGAVSGDDEQEHE  
Tal-VRI TALNLSRSPSPNMDCCYEQNRSLDYGGSSLPKLRHKNQOHNTHSMSNFFNPPSCPM  
Cluma-VRI -----  
Acypi-VRI -----

Drome-VRI PAHMAPLQQRSSPQQGSDANNCLPLKLRHSHLGDKDAATALLSLQHIKQEPNCSTRAS  
Tal-VRI GRPLSTSPLQDQMPPTSPHHYQOISSPMMVNGQHSGRSSTSPSSPTSSHMLYPIKSEPI  
Cluma-VRI -----  
Acypi-VRI -----

```

Drome-VRI      PPAWNDGGDNSSDERDSGISIASAEWTAQLQRKLLAPKEANVVVTS AERDQMLKSQLERLE
Tal-VRI       SREAGEESPGSSDDRDSGISLASSPPLSGAQSYPSSNRDSTEDMDCDSEQQLRVELQRLA
Cluma-VRI     -----
Acypi-VRI     -----

```

```

Drome-VRI      SEVASIKMILAE-----
Tal-VRI       TEVRSLKSIISRNVDSNRQRDSPPRR
Cluma-VRI     -----
Acypi-VRI     -----

```

**Figure S16. Putative *Talitrus saltator* VRILLE (VRI) protein**

Alignment of *Drosophila melanogaster* VRI (Drome-VRI; Accession No. AAF52237) with the *T. saltator* VRI (Tal-VRI) deduced from the Trinity *de novo* transcriptome assembly, together with the top two tblastn species homologue sequences *Clunio marinus* VRI (Cluma-VRI; Accession No. JQ011276) and *Acyrtosiphon pisum* VRI (Acypi-VRI; Accession No. FM998650). '\*' indicates identical amino acid residues in the two proteins, '.' and ':' indicate similar amino acid residues between the two proteins. In this figure a SMART identified basic region leucin zipper domain is highlighted in yellow.
