# Supplementary material for: Identification and temporal expression of putative circadian clock transcripts in the amphipod crustacean Talitrus saltator
Source: PubMed Central journal article supplement (PMC5068443; doi:10.7717/peerj.2555), 2016-10-05
Supplement: peerj-04-2555-s018.pdf [file peerj-04-2555-s018.pdf]

```

Ep-PDH          --MRFIILGVLFIAVASMILSNV-----
Tal-PDH-I      -MLSTTVAVWSAVVMLGCVAGGQD-----
Marja-PDH-II   -----MCRAAVLLFLMLAVAA-----
Dapma-PDH      MHQLSAKLSHFSIALLVLFVSLTMDVESAPAATSSINRPEAQLSIQEMEKFLEGLTRYLH
Eupcr-PDH-Lα   -----MRASVVFLGLFLAFIA-----
Eupcr-PDH-LβI  -----MRGLVVICFMVLVVGVT-----
Eupcr-PDH-LβII -----
Tal-PDH-II     ----MASFKHQLLLLLLGCMLCLAL-----

Ep-PDH          -----MAQ-----SRDFSISEREIVASLAKQLLRVARMGYVPEGDLPR---
Tal-PDH-I      -----LGDLG-----SAPLTVPQRLAISDWAQSIARLADGGLDGPSGLSRRLE
Marja-PDH-II   -----VMVTEA-----QREPTASKCQAATELAIQILQAVKGAHTGVAAGPH--
Dapma-PDH      RQRLEQQRMHQPAKSLMSEEVTYDPDAIDRAILGEMAAPLDAERSSSVELANNSMSHAR
Eupcr-PDH-Lα   -----INDVV-----AQLSTEQDSIVVASLAAQILDVVAGSENDGDSGVQAV-
Eupcr-PDH-LβI  -----IAI-----VHAQEDQERQAVGNLALDILRVVGRAPSAMQ-----
Eupcr-PDH-LβII -----QEDQERQVVGELALGILRIVGQESSGPQ-----
Tal-PDH-II     -----VA-----AQPRRHPDLYSDDDDVAAQLDGEESYGAVPDDLAAWLI-
                .       . *       :

Ep-PDH          -----KRNAELINSLLGVP-----RVMSDAGRR
Tal-PDH-I      LLQQQVELGNLGGWRGSDRLSYGSTRPHDKRNSELINSLGLP-----KFLRE----
Marja-PDH-II   -----KRNSELINSLGLP-----KFMIDAGRR
Dapma-PDH      PPTNNKWPWSLSNFERIEDQNVKQRPYGKRNSELINSLGLP-----RFMKVVG--
Eupcr-PDH-Lα   -----KRNSGTINSMLGLPRTYNLRRMMMHAGRK
Eupcr-PDH-LβI  -----KRNSELINSMLGLPQTLRAQKLMANMGR-
Eupcr-PDH-LβII -----KRNAETINTMLGLPQTLRAQKLMAKLGR-
Tal-PDH-II     -----RSRMP--KRNSELLNTLLGSKNI-----VALRAAGRR
                ***:   :*:***       :

```

**Figure S18. Putative *Talitrus saltator* PIGMENT DISPERSING HORMONE (PDH) peptides**

Alignment of *Eurydice pulchra* PDH (Ep-PDH; Accession no. GQ380440) with the *T. saltator* PDH-I and PDH-II (Tal-PDH-I and Tal-PDH-II) deduced from the Trinity *de novo* transcriptome assembly, together with the top two Tal-PDH-I tblastn species homologue sequences *Marsupenaeus japonicus* PDH-II (Marja-PDH-II; Accession No. AB073368), *Daphnia magna* PDH (Dapma-PDH; Accession No. HQ843173) and the *Euphausia crystallorophias* sequences PDH-La, PDH-LβI, and PDH-LβII (Eupcr-PDH-La, Eupcr-PDH-LβI, and Eupcr-PDH-LβII respectively). '\*' indicates identical amino acid residues in the two peptides, '.' and ':' indicate similar amino acid residues. In this figure the SMART identified PDH domain is highlighted in yellow. The region of Tal-PDH-II that corresponds to the PDH regions of Drome-PDF and Tal-PDH-I is highlighted in blue, though no PDH domain *per se* was identified in this peptide using SMART.
