# Supplementary material for: Identification and temporal expression of putative circadian clock transcripts in the amphipod crustacean Talitrus saltator
Source: PubMed Central journal article supplement (PMC5068443; doi:10.7717/peerj.2555), 2016-10-05
Supplement: peerj-04-2555-s019.pdf [file peerj-04-2555-s019.pdf]

Drome-RORA MASLLGSAPPAQILANQPIIVKIEPTQSFHIVDEGDTRVLSLPLSDADKLGASWIDLKDI  
Tal-RORA -----MDDSTLDLDTSGLLRVGGLLQSSLQDGGSGMGSSSNRDEMMGITHISPANS  
Drogr-RORA -----MYTQRMFDMWSSVTSKLEA-----HANNLG-----  
Droan-RORA -----MYTQRMFDMWSSVTSKLEA-----HANNLG-----  
: . . . : : \*

Drome-RORA AGLQAGGGATLLDVCFEQANEDGTIIATVQPDLENELEAELKAEGEPEDETEPEPPAPKR  
Tal-RORA SQFKQQQESQLSTTTPNILGFPGGNPNSSNSGSTLLNISSIPNLTSPLSCASSNQNSER  
Drogr-RORA -----  
Droan-RORA -----

Drome-RORA LATTRPAQSRPQQQQQQQQQVVKFLSDPPALARSSSFS--SLSSFSSISNISSVCKNMAS  
Tal-RORA ----SPLHQPHSSNNNRDCPAAFETNRSFLESCEDFTLDEISSDRSASTMSSLQNIPI  
Drogr-RORA ----QSNVQSPAAQNN-----  
Droan-RORA ----QSNVQSPAGQNN-----  
. . \* . : :

Drome-RORA NTSQEGSLKRTKERTPPMPPLTTHKPAATTTATSATSAAAATSATASATATSARENSR  
Tal-RORA SGKMGLLERKADRD-----LLNEILAGINEDRDRERDRDRDMADTTTPTSSTPTPTP  
Drogr-RORA -----  
Droan-RORA -----

Drome-RORA EHSSSSSGSNGAMTAQIEIIPCKVCGDKSSGVHYGVITCEGCKGFFRRSQSSVVNYQCPR  
Tal-RORA RIQSVADKKCNSIKAQIEIIPCKVCGDKSSGVHYGVITCEGCKGFFRRSQSSVVNYQCPR  
Drogr-RORA -----SSGSIKAQIEIIPCKVCGDKSSGVHYGVITCEGCKGFFRRSQSSVVNYQCPR  
Droan-RORA -----SSGSIKAQIEIIPCKVCGDKSSGVHYGVITCEGCKGFFRRSQSSVVNYQCPR  
. . : : .\*\*\*\*\*

Drome-RORA NKQCVDVDRVNRNRCQYCRLOKCLKLGMSRD AVKFGRMSKKQREKVEDEVRFHRAQMRAQS  
Tal-RORA QKNCVVDVDRVNRNRCQYCRLOKCLQLGMSRD AVKFGRMSKKQREKVEDEVRYHKSQMRAAS  
Drogr-RORA NKQCVDVDRVNRNRCQYCRLOKCLKLGMSRD AVKFGRMSKKQREKVEDEVRFHRAQMRAQS  
Droan-RORA NKQCVDVDRVNRNRCQYCRLOKCLKLGMSRD AVKFGRMSKKQREKVEDEVRFHRAQMRAQS  
: : .\*\*\*\*\*:\*\*\*\*\*:\*. :\*\*\*\* \*

Drome-RORA --DAAPDSSVYDTQTPSSSDQLHNNYN--SGGYSNNEVGYGSPYGYASVTPQQTMOYD  
Tal-RORA GPETSPDSSVYEPTSP--SQDMFSAQY----GFGSNELNFNHYSFSRPPGGASGSSLD  
Drogr-RORA --DAAPDSSVYDTQTPSSSDQLQHTNYNSYGGYSSNEVGYGSPYGYASVTPQQTMOYD  
Droan-RORA --DAAPDSSVYDTQTPSSSDQLHNNYNYSYGGYSNNEVGYGSPYGYASVTPQQTMOYD  
: : .\*\*\*\*\*: . \* \* : : \* \* : : . \* . : : . \* . : . \*

Drome-RORA ISADYVDSTTYEPRSTIIDPEFISHADGDINDVLIKTAEAHANTNTKLEAVHDMFRKQP  
Tal-RORA ISS--ADSTTYDPQSR-----GCLDIQAQTSLDS-GTDSHSSPLLSACRNER  
Drogr-RORA ISADYVDSTTYEPRSTMIDPEFISHADGDINDVLIKTAEAHANTNTKLESVNDMFRKQP  
Droan-RORA ISADYVDSTTYEPRSTIIDPEFISHADGDINDVLIKTAEAHNNTNTKLEAVHDMFRKQP  
\*\* : .\*\*\*\*\*:\*. \* : : \* : : \* : : \* : : . \* :

Drome-RORA DVSRILYYKNLQGEELWLDCAEKLTMQIONIEFAKLI PGFMRLSQDDQILLKTG--SE  
Tal-RORA Q-----W-----KNSEAVPASWDYRKSQGFRLPLD-----IRSGGCSS  
Drogr-RORA DLSRILYYKNLQGEELWLDCAEKLTMQIONIEFAKLI PGFMRLSQDDQILLKTG--SE  
Droan-RORA DVSRILYYKNLQGEELWLDCAEKLTMQIONIEFAKLI PGFMRLSQDDQILLKTG--SE  
: : \* \* : : \* : : \* : : \* : : \* : : \* : : \*

Drome-RORA ELAIVRMSRLLDLSQNAVLYG--DVMLPQEAFTSDSEEMRLVSRIFQTAKSIAELKLTET  
Tal-RORA NMQGAMKPDLMEGGGSLSHDMDILIKQEV----DGLDMNNLQSSHISGDSVETDMASPD  
Drogr-RORA ELAIVRMSRLLDLSQNAVLYG--DVMLPQEAFTSDSEEMRLVSRIFQTAKSIAELKLTET  
Droan-RORA ELAIVRMSRLLDLSQNAVLYG--DVMLPQEAFTSDSEEMRLVSRIFQTAKSIAELKLTET  
: : . \* : : . : : \* : : \* . \* : : \* . : : . : : \* : :

Drome-RORA ELALYQSLVLLWPERNGVRGNTETIQRLEFNLSMNAIRQELETNHAPLKGDVTVLDTLLNNI  
Tal-RORA HMTSVDSTTFLPCPSVSPQPNSQA---GLHLHHRPHMGFFGAADHGDFDLHHHQQQQ  
Drogr-RORA ELALYQSLVLLWPERNGVRGNTETIQRLEFNLSMNAIRQELETNHAPLKGDVTVLDTLLNNI  
Droan-RORA ELALYQSLVLLWPERNGVRGNTETIQRLEFNLSMNAIRQELETNHAPLKGDVTVLDTLLNNI  
: : \* : : \* . . \* : . \* : : \* : . \* : : \* \* \* : :

```

Drome-RORA      PNF*RD*ISILH*MESLSK*FKLQHPNVVFPALYKELFSIDSQQDLT
Tal-RORA        QQQQ-----EQQQQQQ
Drogr-RORA      PNF*RD*ISILH*MEALSKEFKQ*QHPTVVFPALYKELFSIDSQQDLT
Droan-RORA      PNF*R-----
: .

```

#### **Additional file 24. Putative *Talitrus saltator* RORA protein**

Alignment of *Drosophila melanogaster* RORA (Drome-RORA; Accession No. NP\_788301) with the *T. saltator* RORA (Tal-RORA) deduced from the Trinity *de novo* transcriptome assembly, together with the top two tblastn species homologue sequences *Drosophila grimshawi* RORA (Drogr-RORA; Accession No. XM\_001987136) and *Drosophila ananassae* RORA (Droan-RORA; Accession No. XM\_001959222). '\*' indicates identical amino acid residues in the two proteins, '.' and ':' indicate similar amino acid residues between the two proteins. In this figure SMART identified domains consisting of one C4 zinc finger domain and one HOLI ligand binding domain are highlighted in yellow and green respectively.
