# Supplementary material for: Identification and temporal expression of putative circadian clock transcripts in the amphipod crustacean Talitrus saltator
Source: PubMed Central journal article supplement (PMC5068443; doi:10.7717/peerj.2555), 2016-10-05
Supplement: peerj-04-2555-s021.pdf [file peerj-04-2555-s021.pdf]

```

Drome-SIR2      -----MMENYEEIRLGHIR--SKDLGNQVPDTTQFY--PPTKFDGAEILASTSTEAEA
Tal-SIRT1      --EGLRVMDSTVPAKRLRLDYSGEMLANEQKESFYIRTPDMLSTGG-RVSSSTSSTSSV
Micde-SIRT1    MASGSELPEYSSSVKRRKIE-----GQVYRVSEPLDLDFSESKQPRQSSSSDL
Fopar-SIR2    MASGSELPEYSSQVRRKIE-----SKVYGVSVHFNIDFPEVKVNRDTONIDI
                : : . .: : : : . .

Drome-SIR2      EAEATATTTTEPATSEL-----AGKANGEIKTKTLAAREEQE
Tal-SIRT1      AMEGGSLTCDSGFNELTPPRLLEEEEPQSQLSSVSGSLSSHSPQPHGIKRSHASCIDEDDE
Micde-SIRT1    E---EPLSGDSGFTEL-----S---DGSKSMSTTP-----
Fopar-SIR2    E---EPLGGDSGFDTM-----S---DGAKSMSNTP-----
                . :.. .:: : *

Drome-SIR2      IGA-----NLEHKTKNPT----KSMGEDEDEEEEEEDDEEEE---
Tal-SIRT1      ETAPPARRSPVASLSLGAQRSSMHCNSNSPSPSHHFHNHSSLDGGDPDANDGDDN--S
Micde-SIRT1    -----DLMHLSSTPS-----RTDSTSDDTGCPLDTADEKDEVSS
Fopar-SIR2    -----ESTNLSSTPS-----RTDSTSDDTGCPLDTADEKDEVSS
                . : :..* : .. . * : * .::

Drome-SIR2      -EDDEEGITGTSNEDEDSSSNCSVVEPDWK---LRWLQREFYTGVRVPRQVIASIMPHFA
Tal-SIRT1      VSSDSDRSVRLSNGDDDAAGGEGSDCGEETPEPAHWVQQMRRGQNPRAVLSRVLGADP
Micde-SIRT1    TVSNLSDLSGLSESEDS-----GHLWR-NASSWVQKQMITGANPRELLQHLL-MDP
Fopar-SIR2    TVSNLSDLSGLSESEET-----GQLWR-SASAWVQKQMTGTDPDLLQHLL-MDP
                . : . : : * : : : : * : * : : * * : : : .

Drome-SIR2      TGLAGDTDDSVLWDYLALHLLNEPKRRNKLASVNTFDDVISLVKKSQKIIVLTGAGVSVSC
Tal-SIRT1      SDIPEHVSDEMIWRLLLNLVLTGPRRERLRHLNLTDDAVRLMRTSRRIIVLTGAGVSVSC
Micde-SIRT1    TQIPEQVDDITLWKLVLNIMSDPPRRHKLHINTLADVRLIKNSKKIIVLTGAGVSVSC
Fopar-SIR2    TQIPEQVDDITLWKLVLNIMSDPPRRQKLSYVNTLNDVRLIKDSKKIILT GAGVSVSC
                : : . . * : * : : : : * * . * : * : * . * . * : * * * * * * * * * *

Drome-SIR2      GIPDFRSTNGIYARLAHDFPDLDPDQAMFDINYFKRDRPRPFYKFAREIYPGEFQPSPCHR
Tal-SIRT1      GIPDFRSRDGIYARLAVDFPNLPDQAMFDINFFKRDRPRPFKFAREIYPGQFTPSLCHR
Micde-SIRT1    GIPDFRSRDGIYSRLAQDFPDLDPDQAMFDINYFGQDRPRPFKFAREIYPGQFKPSPCHR
Fopar-SIR2    GIPDFRSRDGIYSRLAQDFPNLPDQAMFDINFFAQDRPRPFKFAREIYPGLEFKPSPCHR
                * * * * * : * * * * * * * * * * * * * * * * * * * * * * * * * * * * * *

Drome-SIR2      FIKMLETKGKLLRNYTQNIDTLERVAGIQRVIECHGSFSTASCTKCRFKCNADALRADIF
Tal-SIRT1      FIRSMENHNKLLRNYTQNIDTLEQVAGINNVIQCHGSFASATCQRCGFKVSAGAIKDDIF
Micde-SIRT1    FIKMLDKKNKLLRNYSQNIDTLEQVAGIENVIECHGSFATASCTKCKYQVTAEDIREDF
Fopar-SIR2    FIKMLEKHKLLRNYSQNIDTLEQVAGIENVIECHGSFATASCTKCKFQVTAEDIRTDIF
                * * . : : : * * * * * . * * * * * . * * * * * : * * * * * . * : : . * *

Drome-SIR2      AQRIPVCPQCQPNKEQ-----
Tal-SIRT1      QQRIPMCPCHTPPTPLPCYGPRDSFYGHHHGGDTPTPPLQSSASLQASPARNESTSPQP
Micde-SIRT1    AQRIPLCPKCYTNSLP-----
Fopar-SIR2    SQRIPLCPKCSTNSLP-----
                * * * * * : * * * * * . .

Drome-SIR2      -----SVDASVAVTEEELRQLV--ENGIMKPD
Tal-SIRT1      GAAGSESPQATGASHNLNLDSPAHNDDSNLETFNLATLCARSDSSNLMQSQPIMKPD
Micde-SIRT1    -----SLSSTNTNDNYANFV--SQGIMKPD
Fopar-SIR2    -----SLATTNTSQNYTDLV--SLGIMKPD
                . : : : : . * * * * *

Drome-SIR2      IVFFGEGLPDEYHTVMATDKDVCDLLIVIGSSLKVRPVAHIPSSIPATVPQILINREQLH
Tal-SIRT1      IVFFGEGLPDEFHDSISEDQNQC DLLIVIGSSLKVRPVAHIPNSIPPHVPQILINREPLD
Micde-SIRT1    IVFFGEGLPDAFHDAIANDKDEC DLLIVIGSSLKVRPVALIPSSIPSVVPQILINRESLP
Fopar-SIR2    IVFFGEGLPDAFHDSIAKDKDEC DLLIVIGSSLKVRPVALIPSSIPSHIPQILINRESLP
                * * * * * * * : * : : * : * * * * * * * * * * * * * * * * *

Drome-SIR2      HLKFDVELLGDSDVIINQICHRLSDNDCWRQLCCDESVLTESKELMPPEHSNHHLLHHLL
Tal-SIRT1      HLTFDIELLGDGDVIVNELCHRLGPS---WTNVCNSHVRLEIRDL-PPKPETP-----
Micde-SIRT1    HLKFDIELLGDGDIIINQLCHLIGEE---FSEICWKKDILEETPHLLPPRFITD-----
Fopar-SIR2    HLKFDVELLGDGDIIINQLCHLMGEE---FLQLCWSEKLEETPHLLPPRFEDS-----
                * * . * * : * * * * * * * . : : * . * * * * *

```

```

Drome-SIR2      LHHRHCSESERQSQLDQSIKSNSSADYILGSAGTCSDSGFESSTFSCGKRSTAAEA
Tal-SIRT1      -----SSSPASARLVAGDGDASVAGSGVAPVAAV-----ADAPHPKDEDDIEALRA
Micde-SIRT1    -----DSWERSQDSTINQELSQDSTEVVLKT-----YHHNVSTESQDSLIMNS
Fopar-SIR2    -----WERSTTS-----TQDSTEVILKQ-----HNLFNESQDSLINS
                : ... : . . :
Drome-SIR2      AAIERIKTDILVELNETTAL--SCDRLGLEGPQTTVESYRHLSDSSKDSGIEQCDNEAT
Tal-SIRT1      CWAPKIREVAARLPENCYLYNGGHRVYVFKGAEVFYDPDDVEGDDDSQNQEDDDDDDED
Micde-SIRT1    NTPPKRLENTDICIISP----FHAGH---MEATEESFA----LLGESPKRPLGDSLESS
Fopar-SIR2    NTPPKHLGSTEICISP----FDAGH---MEGNDGF-----SLLESPKRPLDESSVESS
                . . : . . : . * . : . :
Drome-SIR2      PSYV-----R---PSNLVQETKTVPAPSLTPIQ--QRGKRQTAERLQPGTFY
Tal-SIRT1      GELVDNDDSSPPLHE----ASNSLNPKLVSGDALSGIPSEKEFLPSFSLQNTKEPATGV
Micde-SIRT1    PKRINLEVRASPPSSGSSGSSGSSGISRSLDSDQDINYTTS--RYNRVISVESTSENGHI
Fopar-SIR2    PKRLN-----SR---SCGSTPRSSDDGERF-----RFTRVVSFESTPENNGQV
                . : ... . . : : . :
Drome-SIR2      SHTNNSYVFPQAQVFD-----NDYSDDDDEEEERSHNRHSDLFG
Tal-SIRT1      SPPHSLDDVVEAVQAVEEA-----DQLLYSSCDTITHSDCTR--RTLSCDSSASS
Micde-SIRT1    ---YNLEECHVVPRIIDDLKNSISTLDDLTQSNNSNTPVDVDSSNDSEELLDSDKNG
Fopar-SIR2    ---FNLEECHVLPRIILDQ-----DSGVKGEERRDERE---GEDKYG
                . . . . : : : . . .
Drome-SIR2      NVGHNYKDDDE----DACD-LNAVPLSPLLPPSLEAHIVTD---IVNGSNEPLPNSSPG
Tal-SIRT1      SSCHLSTAATV-----TVEAPSVQEMDSSLGSEQEEDCVDSW-WM-----TLHASLAD
Micde-SIRT1    KSRHISIDSAIDSGLDSCNSVDSSDDKSTIEQGDSKRHNLQRHCWQPEVKESLASRLPE
Fopar-SIR2    KSRHASIDSAIDSGIGDSCNSVDSSEAKEI----EKKRQEIERR-WQGEIKESLANRLPE
                . * : : . . . : . * .
Drome-SIR2      QKRTACIEQQPTPAIETEIPPLKRRPSEENKQQTQIERSEESPPPGQLAAV
Tal-SIRT1      TPSFSSDVAAPTLPSEDCSRPESQPQFNEPSESAPKLNKIESISRTSVAL-
Micde-SIRT1    NTYYQVSPGKIIFTGAEIYIEPDDYQLSSSSSRSPSMSTMIRPATEYNTT--
Fopar-SIR2    GSYQVSSGKIIFPGAEIYLEGDD---FGEPETRANEISSLTYTEDECRIT--
                * . . . . : . :

```

**Figure S21. Putative *Talitrus saltator* SIRT1 protein**

Alignment of *Drosophila melanogaster* SIR2 (Drome-SIR2; Accession No. NP\_477351) with the *T. saltator* (Tal-SIRT1) deduced from the Trinity *de novo* transcriptome assembly, together with the top two tblastn species homologue sequences *Microplitis demolitor* SIRT1 (Micde-SIRT1; Accession No. XM\_008555996) and *Fopius arisanus* SIR2 (Fopar-SIR2; Accession No. XM\_011303457). '\*' indicates identical amino acid residues in the two proteins, '.' and ':' indicate similar amino acid residues between the two proteins. In this figure one SMART identified SIR2 domain is highlighted in yellow.
