# Supplementary material for: Identification and temporal expression of putative circadian clock transcripts in the amphipod crustacean Talitrus saltator
Source: PubMed Central journal article supplement (PMC5068443; doi:10.7717/peerj.2555), 2016-10-05
Supplement: peerj-04-2555-s022.pdf [file peerj-04-2555-s022.pdf]

```

Drome-SIRT2      -----MDKVRFFANTLHLG-GSSDAKEEVKVEK-----
Tal-SIRT2       -----KSFAMASASPKRDADAQDSPDPQPEKAVDDSGVFDASSEETTAGA
Brafl-HYPO      -----VEHLRRLFARTLGLSQERETEEGTARPQQ-----
Trica-SIRT2     MLKRCKSLNSTSNLYKTVLKMSRDSSKDRAEAKPKQPF-----EAQSEEDNASGT
                . : .                ::

Drome-SIRT2     -----VIPDLSFDGFAEHWRVHGFRKIVTMV
Tal-SIRT2       SATDDDSGVFESLMSLIEQKLNFKKTDEEPQ---ILSSLDVDGIVDFMKSDKCHNVITLA
Brafl-HYPO      -----VLDEVTVEGIAKYITDGKCKNIIVLT
Trica-SIRT2     SMS-----IDSLRKYLAEKLGISDKDDEKEKIKILDVSVVDGIAVYIKKKNCKNIITMA
                :: .: .:*:. .      .:.....

Drome-SIRT2     GAGISTSAGIPDFRSPGSGLYSNLKKYELPHPTAIFDLDYFEKNPAPFFALAKELYPGSF
Tal-SIRT2       GAGISTSAGIPDFRSPGSGLYNNLQKYNLAYPEAIFELGFFRENPPFFTLAKELYPGSF
Brafl-HYPO      GAGISTSAGIPDFRSPGTGLYDNLQKYNLNPNAIFELGFFKENPEPFALAKELYPGKF
Trica-SIRT2     GAGISTSAGIPDFRSPGSGLYDNLQKYNLPHQAI FELDFHFNPKPFFTLAKELYPGSF
                *****:***.***:*:*.* * *****:.* :** **:******.*

Drome-SIRT2     IPTPAHYFIRLLNDKGLLQRHYTQNIIDTLDRLTGLPEDKII EAHGSFHTNHCIK--CRKEY
Tal-SIRT2       NPTPCHFFIKLLEQKGLLRHYTQNIIDTLEHVAGISEEKLIEAHGSFRTAHCLG--CRKSY
Brafl-HYPO      KPTWCHYFIKLLSDKGLLRNFTQNIIDTLERVAGVSAGAMVEAHGTFYTAHCLGECRKEY
Trica-SIRT2     KPTISHYFIKLLIEKDVLLRHYTQNIIDTLERIAGIPEEKIVEAHGTFYTGCLA--CRKEY
                ** .:*:*.* * :.*:* *:*:*****:.*:.* .:*****:* * **:* **.*

Drome-SIRT2     DMDWMKAEIFADRLPKCQ--KCQGVVKPDIVFFGENLPKRFYSSPEEDFQDCDLIIMGT
Tal-SIRT2       DQQWIKDEVFADRVPTCE--SCGSVVKPDIVFFGEGLPKDFFGAVRSDFRKCDLLIVMGT
Brafl-HYPO      TQEWVKEKVFENDEVRCP--DCDGVVKPDIVFFGEAMPKFFPSVLADFPRCDLLIVMGT
Trica-SIRT2     QLEWMKERIFKDEVPECESKDCKGVVKPDIVFFGEALPKDFYSLIENDFKKCDLLIILGS
                :*:* :* * :* * . * .*****:* * .:* ** *****:.*:

Drome-SIRT2     SLEVQEFASLVWRPGRPCIRLLINRDAV--GQASCVLFPDNPTRSLFLDKPNNTRDVAF
Tal-SIRT2       SLTVQEFASLIDNVSSTCPRLLINRDAVGPAGAAATIQRMLMGHSGFQPDSPKNKRDAVAL
Brafl-HYPO      SLQVQEFASLVDRVPETCPRLLINREKC--GQVDPIMRMLGFGGGMEFDSENNYRDVAW
Trica-SIRT2     SLVVQEFASLVDRVLDTCPRLLINREKV---NNGSGIMAMFGFGAGFDFDGNKNNTRDVAW
                ** *****: . * *****: . : : .: * :* ****

Drome-SIRT2     LGDCDAGVMALAKALGWDQELQQLITSERKKLSGSQNSEELQQGKEKPSDPDKMTSGDR
Tal-SIRT2       LGDCDDGCLMLAEKLGWKEDLQKLIIEGKKKPDAT-----
Brafl-HYPO      LGDCDEGCKALAEELLGWKEQLEELVHREHTRIEAQ-----
Trica-SIRT2     IGDCDEGCQLLADKLGWDELKLRQTEIEKIEKA-----EA
                :**** * ** .*** :*:*:* . .

Drome-SIRT2     DKKDASL
Tal-SIRT2       -----
Brafl-HYPO      -----
Trica-SIRT2     TPVKSSM

```

**Figure S22. Putative *Talitrus saltator* SIRT2 protein**

Alignment of *Drosophila melanogaster* SIRT2 (Drome-SIRT2; Accession No. NP\_650880) with the *T. saltator* SIRT2 (Tal-SIRT2) deduced from the Trinity *de novo* transcriptome assembly, together with the top two tblastn species homologue sequences *Tribolium castaneum* SIRT2 (Trica-SIRT2; Accession No. XM\_963962) and *Branchiostoma floridae* hypothetical protein (Brafl-HYPO; Accession No. XM\_002596789). '\*' indicates identical amino acid residues in the two proteins, '.' and ':' indicate similar amino acid residues between the two proteins. In this figure one SMART identified SIR2 domain is highlighted in yellow.
