# Supplementary material for: Identification and temporal expression of putative circadian clock transcripts in the amphipod crustacean Talitrus saltator
Source: PubMed Central journal article supplement (PMC5068443; doi:10.7717/peerj.2555), 2016-10-05
Supplement: peerj-04-2555-s023.pdf [file peerj-04-2555-s023.pdf]

```

Drome-SIRT4 -----MRVQQLRFRSTSLRSSTARQ-----
Tal-SIRT4  MYILQKSCCTCHIFFIIKQKPIAATVTRNVLLQPPTKSHFKFLSNLRTDSTIKCFRSNRHQ
Brafl-HYPO -----MPVR--LQSNATTRVNTANF-----
Diasi-SIRT4 -----MTTCRIQRLFFKHFIVPPDVTSRSI-----
                               :         . * .

Drome-SIRT4 -----EYVPHHKPVVEDDIKRLLEDFLLSKPNVLVLTGAGISTESGIPDYRSEGVG
Tal-SIRT4  FLLSRFCNNSAFVPKHDPCEELIEQLQAFVTRS NKIFVLTGAGISTESGIPDYRSEGVG
Brafl-HYPO -----HFVVPVSDPADLQDVEELQDFVSTSKRLEFVITGAGISTESGIPDYRSEGVG
Diasi-SIRT4 -----SFIPKHKPVEESDINKLKQFIEKYNKILVVTGAGISTESGIPDYRSEGVG
                               ::* . * . : : * : * : . : * :*****

Drome-SIRT4 LYARSNHKPVQHMEFVKSSAVRKRYWARNFVGVGPKFSATQP NATHHALARFEREERVQAV
Tal-SIRT4  LYATSSKRVPQIKDFIAKAEVRQSYWARNYVGVGPRFSAFEPNTTHTT LAEWEQKGVVAHI
Brafl-HYPO LYARSDNRPVQYADFLKSGAIRQRYWARNYVGVGPKFSSFPNISHETLSGWESVGLHHL
Diasi-SIRT4 LYARSDKRPVQFQDFLKSRRVRIRYWARNFVGVGPRFSSFPNANH YALKQMEDNEKLSYI
                               *** * : : *** : * : . : * ***** : *** . * : * * . : :

Drome-SIRT4 VTQNVDRDLHTKAGSRNVVEVHGSGYVVKCLSC EYRIDRHEFQSILASLNPAF--KDAPDMI
Tal-SIRT4  VTQNVDALHQKAGSIKVTE LHGSAHVQCMQC SHSLPRHALQPLLASLNPHLALPSSQLI
Brafl-HYPO VTQNVDSLHIKAGSRKVT ELHGSAARVMCLSCPSVI PR TDMQTRIKHLNPVW--HAESQEM
Diasi-SIRT4 ITQNV DGLHYKAGNKKVIEMHGTA FRVMCLGCDYE I DRHKFQKILEDLNPDL--MIESQEM
                               :***** * * * * . : * * : * : . * * : * : * * * . : :

Drome-SIRT4 RPDGDVEI PLEYIENFRIP ECTQCGDLKPEIVFFGD SVPRPRVDQIAGMVYNSDGLLVL
Tal-SIRT4  RPDGDVELTQEAVSRFVPPCPCSGLLKPHV VFFGDNVPRARVEAVKEELRRC DALLAL
Brafl-HYPO APDADVFLAPEQIAGFRVPECEKCGGILK PQIVFFGDNV PKPTVQFVHKMLEESDAMLVA
Diasi-SIRT4 RPDGDVEMSEETISKFHVPQC PHCHGDLKPDIVFFGDNI PRHRMEKIDHLVRS CDGVLVL
                               ** . * * : . * : * : * * * * * :***** : * . : : : . * : * .

Drome-SIRT4 GSSLVFSGYRVVLQTKDLKLPVGI VNIGETRADHLADIKISAKCGDVIPKLFDFRNSKS
Tal-SIRT4  GTSLQVYSAYRFILLASELGLPMAAVNIGTTRGDHLLQLRVPARCGLVLP LHL-----
Brafl-HYPO GSSLQVYSAYRFVSAARDQKKPIAVLNIGPTRGDKLADLKV SARCGDVL PQIHL-----
Diasi-SIRT4 GSSLTVYSGYRILLEATDLHLPIAIVNIGPTRGDSL AQLKVDKCSQVLASLRKDQS---
                               * : * * : * : * : * : * : * : * : * : * : * : * : * : * : * : * : * : * :

Drome-SIRT4 VS
Tal-SIRT4  --
Brafl-HYPO --
Diasi-SIRT4 --

```

### Additional file 23. Putative *Talitrus saltator* SIRT4 protein

Alignment of *Drosophila melanogaster* SIRT4 (Drome-SIRT4; Accession No. NP\_572241) with the *T. saltator* SIRT4 (Tal-SIRT4) deduced from the Trinity *de novo* transcriptome assembly, together with the top two tblastn species homologue sequences *Branchiostoma floridae* hypothetical protein (Brafl-HYPO; Accession No. XM\_002605838) and *Diaphorina sitri* SIRT4 (Diasi-SIRT4; Accession No. XM\_008482696). '\*' indicates identical amino acid residues in the two proteins, '.' and ':' indicate similar amino acid residues between the two proteins. In this figure one SMART identified SIR2 domain is highlighted in yellow.
