# Supplementary material for: Identification and temporal expression of putative circadian clock transcripts in the amphipod crustacean Talitrus saltator
Source: PubMed Central journal article supplement (PMC5068443; doi:10.7717/peerj.2555), 2016-10-05
Supplement: peerj-04-2555-s025.pdf [file peerj-04-2555-s025.pdf]

Drome-SIRT7 MEKDLGEEKDQDQEQNTEMEPKQEMDVAQSYITRAKMNPAKKDNEKRRRKDAMRRVSMIL  
Tal-SIRT7 -----VLMDERKTTVNMMDDEEGDVVENAKRKAATNATLNLSKSSSKMKRVTWLL  
Megro-SIRT7 -----MEEAASEKFLSRRRSAAALKAFFKVKDERVATFKKVAAIL  
Arido-SIRT7 -----MEETSNEKFLSRRRSATLKAFKVKDERIATFKKVAAIL

\* : . . . : . : . . . : \*

Drome-SIRT7 RKCDSMR--TTEDRQFLKHPDMVKTTKRKRERVEIYKERVVEREDAPHVIEAKVEQLAN  
Tal-SIRT7 RKRQEHKQLSNDEQKFLADNPKLVDQFNKRREKRQEYQSRHIEKEDSPETLREKCAELAQ  
Megro-SIRT7 QKSETDR--TAEETGILVSCSDVVKVNLRQEKRRHRVKARLEEVEDAPEILEEKIRLAA  
Arido-SIRT7 QKSETDR--TAEIIGILISCSDIVKEVNLRQEKRRHRVKARLEEIEDAPELLEEKCMRLAA  
. \* : . : : : \* . . . : \* . \* . : \* \* \* \* : \* \* \*

Drome-SIRT7 IISQAKHLVICYTGAGISTAALIPDYRGSQGIWTLQKGQDIGEHDLSANPTYTHMALYE  
Tal-SIRT7 ALHDAEFLVVYTGAGISTSANIPDYRGPNGIWRQLQGEDIGSHDLTEAEPVTTHMALSA  
Megro-SIRT7 AISRATSLAIYTGAGISTAASIPDYRGTNGVWTRQLQGKDIGNHLSQAEPTVTHMALYA  
Arido-SIRT7 AISRATSLAVYTGAGISTAASIPDYRGTNGVWTRQLQGKDIGNHLSQAEPTLTHMALYA  
: \* \* . \* \* \* \* \* \* : \* \* \* \* \* \* : \* \* \* \* \* \* : \* \* \* \* \* \* : \* \* \* \* \* \*

Drome-SIRT7 LHRRRLLHHVVSQNC DGLHLRSGLPRNSLSEIHGNMYEVCKNCRPNVSVYWRQFDTTEMT  
Tal-SIRT7 LQKTGRQLQHVVSQNC DGLHLRSGLPKTALSEVHGNYIEVCRCVPAPEYVRTFDVTEKT  
Megro-SIRT7 LYKARVLKHVVSQNC DGLHLRSGLPRTLSEVHGNYIEVCRTCKPYREYWRFLFDVTEKT  
Arido-SIRT7 LYKARVLKHVVSQNC DGLHLRSGLPRTLSEVHGNYIEVCRICKPYREYWRFLFDVTEKT  
\* . \* : \* : \* \* \* \* \* \* \* : \* . \* \* : \* \* \* \* : \* \* \* \* \* \* \* : \* \* \* \* \* \* \*

Drome-SIRT7 ARYCHKTHRLLCHRCSEPLYDTIVHFGGERGNVWPLNWAGATANAQRADVILCLGSSLKVL  
Tal-SIRT7 STYKHATGRRRCYRCGEPLVDSIVHFGGERGKLRWPLNWQACQAANAADTILCLGSSLKVL  
Megro-SIRT7 ARYSHGTGRLCHRCNSVLHDSIVHFGGERGNLWPLINWNGATRAAQADVILCLGSSLKVL  
Arido-SIRT7 ARYSHGTGRLCHRCNSVLQDSIVHFGGERGNLWPLINWNGATRAAQADVILCLGSSLKVL  
: \* \* \* \* \* : \* \* . \* \* : \* \* \* \* \* : : \* \* : \* \* \* \* \* : \* \* : \* \* \* \* \* \*

Drome-SIRT7 KKYTWLWQMDRPARQAKICVVNLQWTPKDIAIASIKNGKCDQVMAQLMHLHLHIPVVPVYT  
Tal-SIRT7 KKYTWLWQMDRPARRRPRLVYVNLQWTPKDKEATMKINGKCDVEMKLVMDYMGIEIPRYN  
Megro-SIRT7 KKYVWLWQMDRPIHKRPSLYIVNLQWTPKDENAFLKINGKCDVEMKRMVMHGLGLEIPQYD  
Arido-SIRT7 KKYVWLWQMDRPIHKRPSLYIVNLQWTPKDENAFLKINGKCDVEMKRIMTHLGLGLEIPQYN  
\* \* . \* \* \* \* \* \* : \* : \* \* \* \* \* \* \* : \* \* \* \* \* \* \* : \* : \* : \* \*

Drome-SIRT7 KEKDPIFAHASLLMPEELHTLTQPLLN-----ADEEEAFTTTEETQDSTISSESC  
Tal-SIRT7 RSEDLIFDMATPLHPDELRTTTRPSLVPPIDLPIPIEESSNNLEENVTERNKSPVSVETC  
Megro-SIRT7 RTKDPIFFHAVRLRSNEQQTTSQPCLEEPANM---TLKEIDEITDNFHEDIASETKEEDC  
Arido-SIRT7 RAKDPIFFHAVRLRNSEQHTTSQPCLEEPTNI---VHKELNQIDDNFHEDISSSTKEKEC  
. : \* \* \* \* \* . \* . : \* \* \* . . : : . \* \* . : \*

Drome-SIRT7 SFNYS-----DLPKIGKPRIPTPIKNGRVTNLELRQKFKTLNGQDEEIKVEHVKTN  
Tal-SIRT7 QNSRRFDRDDLKNEVSVDERCSKVLNCAVPCNSSGDRISKYDGISASTMTNDIECGETI  
Megro-SIRT7 ASPIK-----  
Arido-SIRT7 ISSKR-----

Drome-SIRT7 GEVKTEKDLITLESSIKIETEVKLEKLECSDTNFQQLK-----  
Tal-SIRT7 IELPSVAQCKNGISLEKHLKHFTRDNLNCCSSQTCCHTRSQYSDILQVNSKCSNYDSRLC  
Megro-SIRT7 -----  
Arido-SIRT7 -----

Drome-SIRT7 -----LLELLPKLEPLSLKEETEETPSNGFPELPK  
Tal-SIRT7 ISTSDSVVRTLATSTASVVVTRVSRSPCAVSWESVPAEVLSETCSSQSDNPGSEFVHESS  
Megro-SIRT7 -----  
Arido-SIRT7 -----

Drome-SIRT7 LVAIQKTHAECLSAVPTESRLKPLQLPPLVPIGAPLSTPFVPEKLVLPASQSSS-----  
Tal-SIRT7 VSPSVEINTSSVTLSSSTSCSPSYSTVATPRMTTTLLEGEISGPGLAPSKCEHCTTGSCIH  
Megro-SIRT7 -----ISQNP-----QLVP-----  
Arido-SIRT7 -----VTESMSAYSAPFFTALPFLSMGLPFPMPYMCPQLTP-----  
: : : \* .

```

Drome-SIRT7      ---IQIKSEGDGDSSTENDNEEEEESELAQM-----DLLRQNNDEELLRQLP-----
Tal-SIRT7        CEVLRLFSGMDGCELLSGDQCKCEVVMKKMFSCGAAPKLMKCDKCGFLRFFLLGTCRP
Megro-SIRT7      -----
Apido-SIRT7      -----LFYYP-----

Drome-SIRT7      -----TWYDAKYAYSGLHSILIPPPADLNIWNSQVVPNFA
Tal-SIRT7        ASRNGELNVNGKLNFGCTVSHLFCDCFEKQQLAVNGAKLPSSASGDASVAATAAAAATVT
Megro-SIRT7      -----
Apido-SIRT7      -----FVQVPNIT

Drome-SIRT7      --MNRSAAS-CFFCFDRYAELECQFYRRWNLS-----QRKHKKRARSGRFVVCECCPTS
Tal-SIRT7        SIIATAAESRSLVTLHVDASELCSQESSGEDSIVMLDCDDMEFKDQKFQDGDIDIKIDDEV
Megro-SIRT7      -----SVWRTRGHLL-----
Apido-SIRT7      SDVPKPKPT-CTFCMENEGSLTCLYYQRETDNSTLIGTESKQIKDTK-----

Drome-SIRT7      DDDDDYDENISLAHIAAAETAKRRQQLSTSFPRKLARTQAGWYGKGYKGRKRR-----
Tal-SIRT7        KDVKNFEIFNDACKERKEDIKISKPTFLTNHALSRLSSDHELKNDFRKNFELHSDSLKT
Megro-SIRT7      -----VFITNEIPIILV-----
Apido-SIRT7      -----TLVIHADPPIAAKNPGWFGKGYRKGMKKKR-----

Drome-SIRT7      -----
Tal-SIRT7        EDVKEEKLDVHSSCPVLNFDNTSCKLEKKDENCKLYDSLASSIVNMTSKSKSFCQED
Megro-SIRT7      -----
Apido-SIRT7      -----

```

**Figure S25. Putative *Talitrus saltator* SIRT7 protein**

Alignment of *Drosophila melanogaster* SIRT7 (Drome-SIRT7; Accession No. NP\_651664) with the *T. saltator* SIRT7 (Tal-SIRT7) deduced from the Trinity *de novo* transcriptome assembly, together with the top two tblastn species homologue sequences *Megachile rotundata* SIRT7 (Megro-SIRT7; Accession No. XM\_012287821) and *Apis dorsata* SIRT7 (Apido-SIRT7; Accession No.). '\*' indicates identical amino acid residues in the two proteins, '.' and ':' indicate similar amino acid residues between the two proteins. In this figure one SMART identified SIR2 domain is highlighted in yellow.
