# Supplementary material for: Identification and temporal expression of putative circadian clock transcripts in the amphipod crustacean Talitrus saltator
Source: PubMed Central journal article supplement (PMC5068443; doi:10.7717/peerj.2555), 2016-10-05
Supplement: peerj-04-2555-s026.pdf [file peerj-04-2555-s026.pdf]

```

Drome-JET          -----MCTLHPEEEAHLMMAMASGGQPTRTA
Tal-JET           HIILAHLPPIFSHIFWERISRKMKMINQNNINRLELVKVFSEDEALINKKLPRELLLRVL
Oruab-FBOX/LRR   MI-----HSGRTRLELTTWVFHDDEAQINKKLPKELLLRIM
Harsa-FBOX/LRR   MI-----HSGRTRLELTTWVFHDDEAQINKKLPKELLLRIL
                  :  .. ::* :      .      *

Drome-JET          SPRPLVTASIAA--PRSLFDVCWDDVLIPQVAVYLSLKDL-----FN
Tal-JET           SFLDVVSLCRCAQVSHYWHSLALDGANWQRI DLFNFQTDIEGVVVEQIGRRC GGFLKELS
Oruab-FBOX/LRR   SYLDVVSLCRCAQVSKAWNVLALDGSNWQRI DLFDFQRDVEGPVIENISRRC GGFLRQLS
Harsa-FBOX/LRR   SYLDVVSLCRCAQVSKAWNVLALDGSNWQRI DLFDFQRDVEGPVIENISRRC GGFLRQLS
                  *  :*: . .* ..  .: * .  .: : :  *:      :.

Drome-JET          LRCCSRTAQ--RFVEAALEKRQELHLSGNNTKNI-DVAFRVLARC CQRLEVLHLACCRW
Tal-JET           LRGCSVKDDPLITITSLCRNIERLNLT--NCKNITDLTCGALSRHCPRLRLLELESCSK
Oruab-FBOX/LRR   LRGCSIGNNSMRTLAQSCPNIEDLNLR--QCKKISDATCAALSSHCPKLQRLNLDSCPE
Harsa-FBOX/LRR   LRGCSIGNNSMRTLAQSCPNI EELNLS--QCKKISDATCAALSSHCPKLQRLNLDSCPE
                  ** * .  :      :      : : *:*  : *:* * : .*: * .* * * . *

Drome-JET          LTDELLLPL-----
Tal-JET           VTDQSLQLLADGCPHLVFLNIAWCSEITSAGVEAVAKGCPELEVFAKGVKELRDQALLO
Oruab-FBOX/LRR   VTDLSLKSLSDGCPPLLTHINLSWCELLTDNGVEALARGCPELRSFSLSKGCRQLTDRAVKC
Harsa-FBOX/LRR   ITDISLKSLSDGCPPLLTHINLSWCELLTDNGVEALARGCPELRSFSLSKGCRQLTDRAVKC
                  :** * *

Drome-JET          LAN NKKRLWAVNLNECVNITALSLQPIIVE CKELRVLKLSKCQWLTTGAVDALTLHQSKL
Tal-JET           LASNCPKLRHVNLHSCVLTVDASVTVLAEKCPGLRYLCLSNCSALSDASLQTLALHNTKL
Oruab-FBOX/LRR   LARYCPNLEA INLHECRNITDDAVRELSERCPRLHYVCLSNCPNLTDASLCTLAQHCPLL
Harsa-FBOX/LRR   LARYCPNLEA INLHECRNITDDAVRELSEQCPRLHYVCLSNCPNLTDASLVTLAQHCPLL
                  ** . *  :*: .*  :*  : :  * * .  : **:* * : .: : : * . *

Drome-JET          VEFDISYCGAIGERCLIIFFRKLNKLTVLSLANTPSVTDQVLIQIGNYCRELEHINVIGC
Tal-JET           ETLEVANCAQFTDNGFQALARSCLLERIDLEDCLLITDATLSHLAMGCPRLEKLSLSHC
Oruab-FBOX/LRR   SVLECVACTHFTDAGFQALARNCRLEKMDLEECVLITDATLIHLAMGCPRLEKLSLSHC
Harsa-FBOX/LRR   SVLECVGCTHFTDAGFQALAKNCRLEKMDLEECVLITDATLIHLAMGCPRLEKLSLSHC
                  : :  *  : :  :  : . . . *  :.* :  : ** .*  :.  *  **::: : *

Drome-JET          AAISDYGVHAI---TVHCLRRLRLLIRRCPRVTELSLAPLRQR RLYIDRPQ-----
Tal-JET           ELITDEGIRHLGSA ACSTEQLSVLELDNCPLITDASLDHLL-ACHNLHRIELYDCQQITR
Oruab-FBOX/LRR   ELITDEGIRQLALS PCA SEHLAVLELDNCPLITDASLDHLLQACHNLQRIELYDCQLITR
Harsa-FBOX/LRR   ELITDEGIRQLALS PCA AEHLAVLELDNCPLITDASLDHLLQACHNLRIELYDCQLITR
                  *:* * :. * .  . * . * : .** :* : ** *  : * :

Drome-JET          -----PDVGLNAYNLNDFYPSD-----FLVY
Tal-JET           AGIRRLKAHLPNIKVQAYFAPQTPVPENTP-HRLHRCCTIL
Oruab-FBOX/LRR   AGIRRLRTHLPNIKVHAYFAPVTPPPSAGASTQRYCRCCVIL
Harsa-FBOX/LRR   AGIRRLRTHLPNIKVHAYFAPVTPPPSAGASRPYCRCCVIL
                  *:: ::**      *      :

```

**Figure S26. Putative *Talitrus saltator* JETLAG protein**

Alignment of *Drosophila melanogaster* JETLAG (Drome-JET; Accession No. NP\_608880) with the *T. saltator* JETLAG (Tal-JET) deduced from the Trinity *de novo* transcriptome assembly, together with the top two tblastn species homologue sequences *Orussus abietinus* F-box/LRR repeat protein 20 (Oruab-FBOX/LRR; Accession No. XM\_012430170) and *Harpegnathos saltator* F-box/LRR repeat protein 20 (Harsa-FBOX/LRR; Accession No. XM\_011152298). '\*' indicates identical amino acid residues in the two proteins, '.' and ':' indicate similar amino acid residues between the two proteins. In this figure SMART

identified domains consisting of one F-box domain and multiple leucine-rich repeat domains are highlighted in yellow and green respectively.
