# Supplementary material for: Identification and temporal expression of putative circadian clock transcripts in the amphipod crustacean Talitrus saltator
Source: PubMed Central journal article supplement (PMC5068443; doi:10.7717/peerj.2555), 2016-10-05
Supplement: peerj-04-2555-s027.pdf [file peerj-04-2555-s027.pdf]

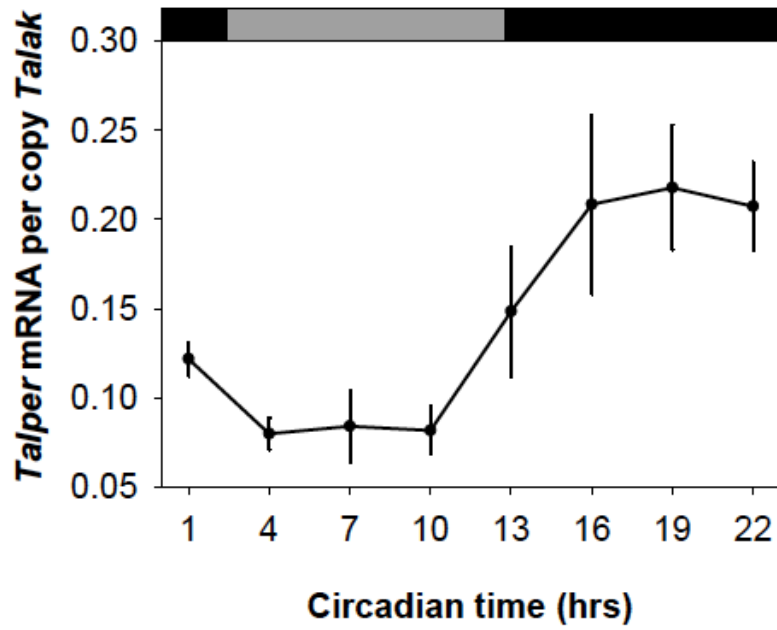

**Figure S27. Expression profiling of *Talper* mRNA by Taqman PCR**

Timecourse samples taken from behaviourally rhythmic animals held in DD yield rhythmic changes in *Talper* abundance with peak mRNA levels in early night.

*Talper* expression is normalised to *Talak* and shown as mean expression  $\pm$  SEM (N=4). Black and grey bars illustrate time of expected day and night, respectively.
